# Supplementary material for: Blue Biotechnology: Computational Screening of Sarcophyton Cembranoid Diterpenes for SARS-CoV-2 Main Protease Inhibition
Source: MDPI journal article supplement (doi:10.3390/md19070391), 2021-07-13
Supplement: s1 [file s1]

## Article

# Blue Biotechnology: Computational Screening of *Sarcophyton* Cembranoid Diterpenes for SARS-CoV-2 Main Protease Inhibition

Mahmoud A. A. Ibrahim <sup>1,\*</sup>, Alaa H. M. Abdelrahman <sup>1</sup>, Mohamed A. M. Atia <sup>2</sup>, Tarik A. Mohamed <sup>3</sup>, Mahmoud F. Moustafa <sup>4,5</sup>, Abdulrahim R. Hakami <sup>6</sup>, Shaden A. M. Khalifa <sup>7</sup>, Fahad A. Alhumaydhi <sup>8</sup>, Faris Alrumaihi <sup>8</sup>, Syed Hani Abidi <sup>9</sup>, Khaled S. Allemailem <sup>8</sup>, Thomas Efferth <sup>10</sup>, Mahmoud E. Soliman <sup>11</sup>, Paul W. Paré <sup>12</sup>, Hesham R. El-Seedi <sup>13,14,15,\*</sup> and Mohamed-Elamir F. Hegazy <sup>3,10,\*</sup>

<sup>1</sup> Computational Chemistry Laboratory, Chemistry Department, Faculty of Science, Minia University, Minia 61519, Egypt; a.abdelrahman@compchem.net

<sup>2</sup> Molecular Genetics and Genome Mapping Laboratory, Genome Mapping Department, Agricultural Genetic Engineering Research Institute (AGERI), Agricultural Research Center (ARC), Giza 12619, Egypt; matia@ageri.sci.eg

<sup>3</sup> Chemistry of Medicinal Plants Department, National Research Centre, 33 El-Bohouth St., Dokki, Giza 12622, Egypt; tarik.nrc83@yahoo.com

<sup>4</sup> Department of Biology, College of Science, King Khalid University, Abha 9004, Saudi Arabia; hamdony@yahoo.com or mfmstfa@kku.edu.sa

<sup>5</sup> Department of Botany & Microbiology, Faculty of Science, South Valley University, Qena 83523, Egypt

<sup>6</sup> Department of Clinical Laboratory Sciences, College of Applied Medical Sciences, King Khalid University, Abha 61481, Saudi Arabia; ahakami@kku.edu.sa

<sup>7</sup> Department of Molecular Biosciences, The Wenner-Gren Institute, Stockholm University, S-106 91 Stockholm, Sweden; shaden.khalifa@su.se

<sup>8</sup> Department of Medical Laboratories, College of Applied Medical Sciences, Qassim University, Buraydah 51452, Saudi Arabia; f.alhumaydhi@qu.edu.sa (F.A.A.); f\_alrumaihi@qu.edu.sa (F.A.); k.allemailem@qu.edu.sa (K.S.A.)

<sup>9</sup> Department of Biological and Biomedical Sciences, Aga Khan University, Karachi 74800, Pakistan; m.haniabidi@gmail.com

<sup>10</sup> Department of Pharmaceutical Biology, Institute of Pharmaceutical and Biomedical Sciences, Johannes Gutenberg University, Staudinger Weg 5, 55128 Mainz, Germany; efferth@uni-mainz.de

<sup>11</sup> Molecular Modelling and Drug Design Research Group, School of Health Sciences, University of KwaZulu-Natal, Westville, Durban 4000, South Africa; soliman@ukzn.ac.za

<sup>12</sup> Department of Chemistry & Biochemistry, Texas Tech University, Lubbock, TX 79409, USA; paul.pare@ttu.edu

<sup>13</sup> Department of Chemistry, Faculty of Science, El-Menoufia University, Shebin El-Kom 32512, Egypt

<sup>14</sup> International Research Center for Food Nutrition and Safety, Jiangsu University, Zhenjiang 212013, China

<sup>15</sup> Pharmacognosy Group, Department of Pharmaceutical Biosciences, Uppsala University, Biomedical Centre, Box 574, 751 23 Uppsala, Sweden

\* Correspondence: m.ibrahim@compchem.net (M.A.A.I.); hesham.elseedi@su.se (H.R.E.-S.); elamir77@live.com (M.-E.F.H.); Tel.: +20-10-241-61-444 (M.A.A.I.); Tel.: +46-70-043-4343 (H.R.E.-S.); Tel.: +20-33-371-635 (M.-E.F.H.)

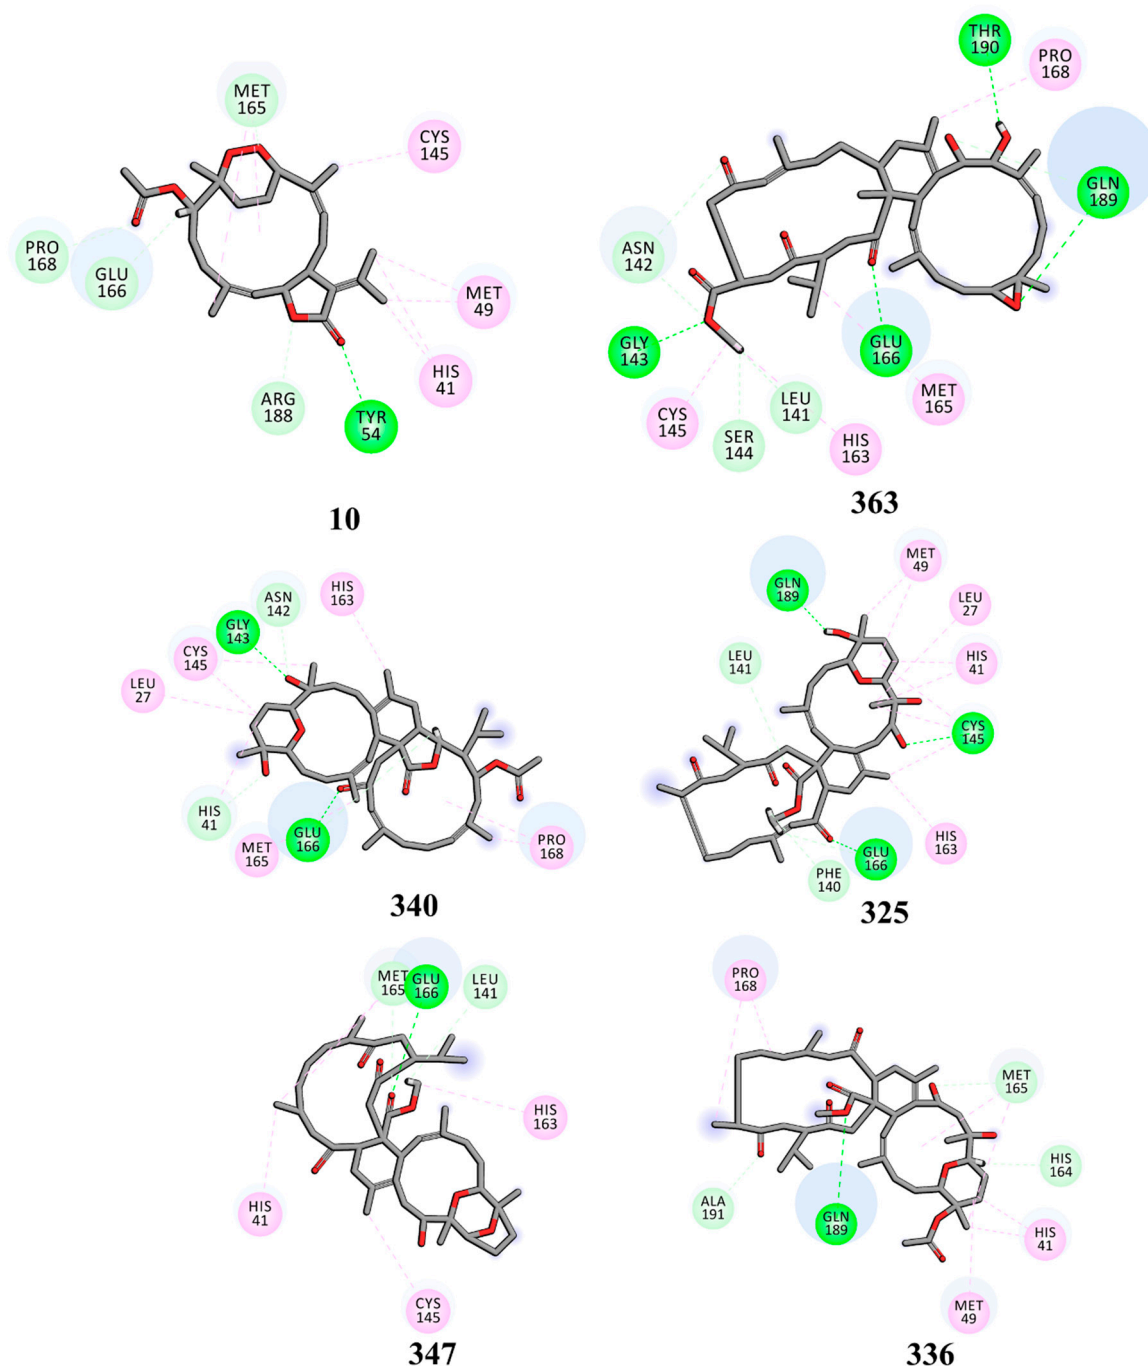

**Figure S1.** 2D representations of interactions of darunavir and the top 59 potent *Sarcophyton* cembranoid diterpenes metabolites with the proximal amino acid residues of SARS-CoV-2 main protease (M<sup>pro</sup>).

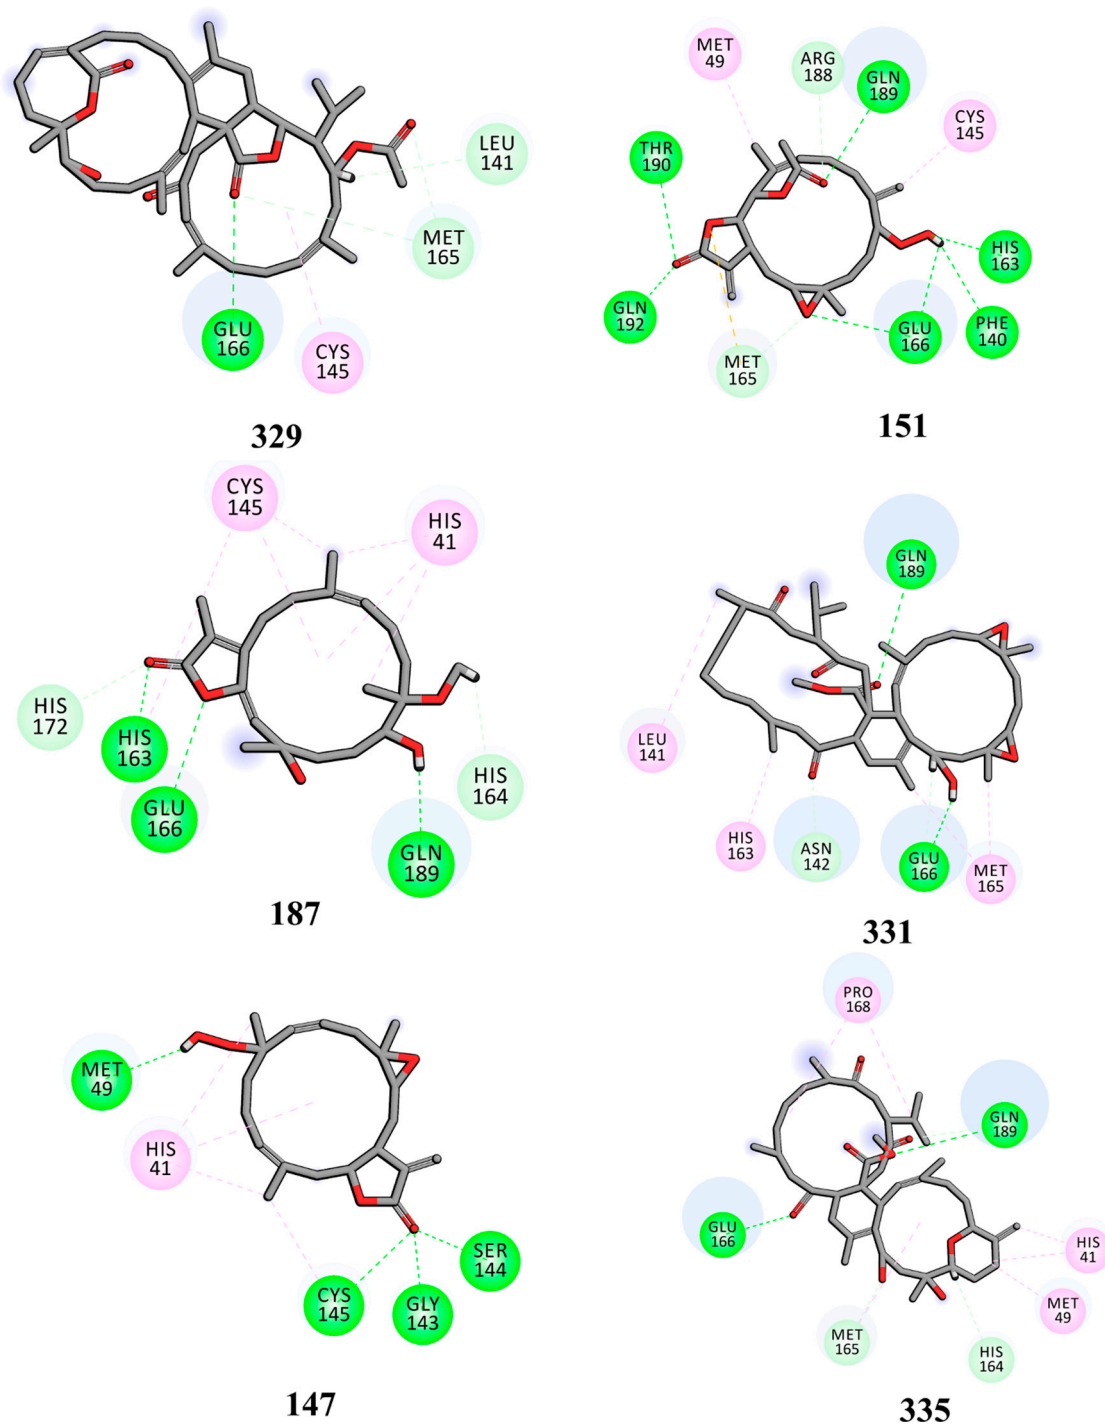

**Figure S1. Continued.**

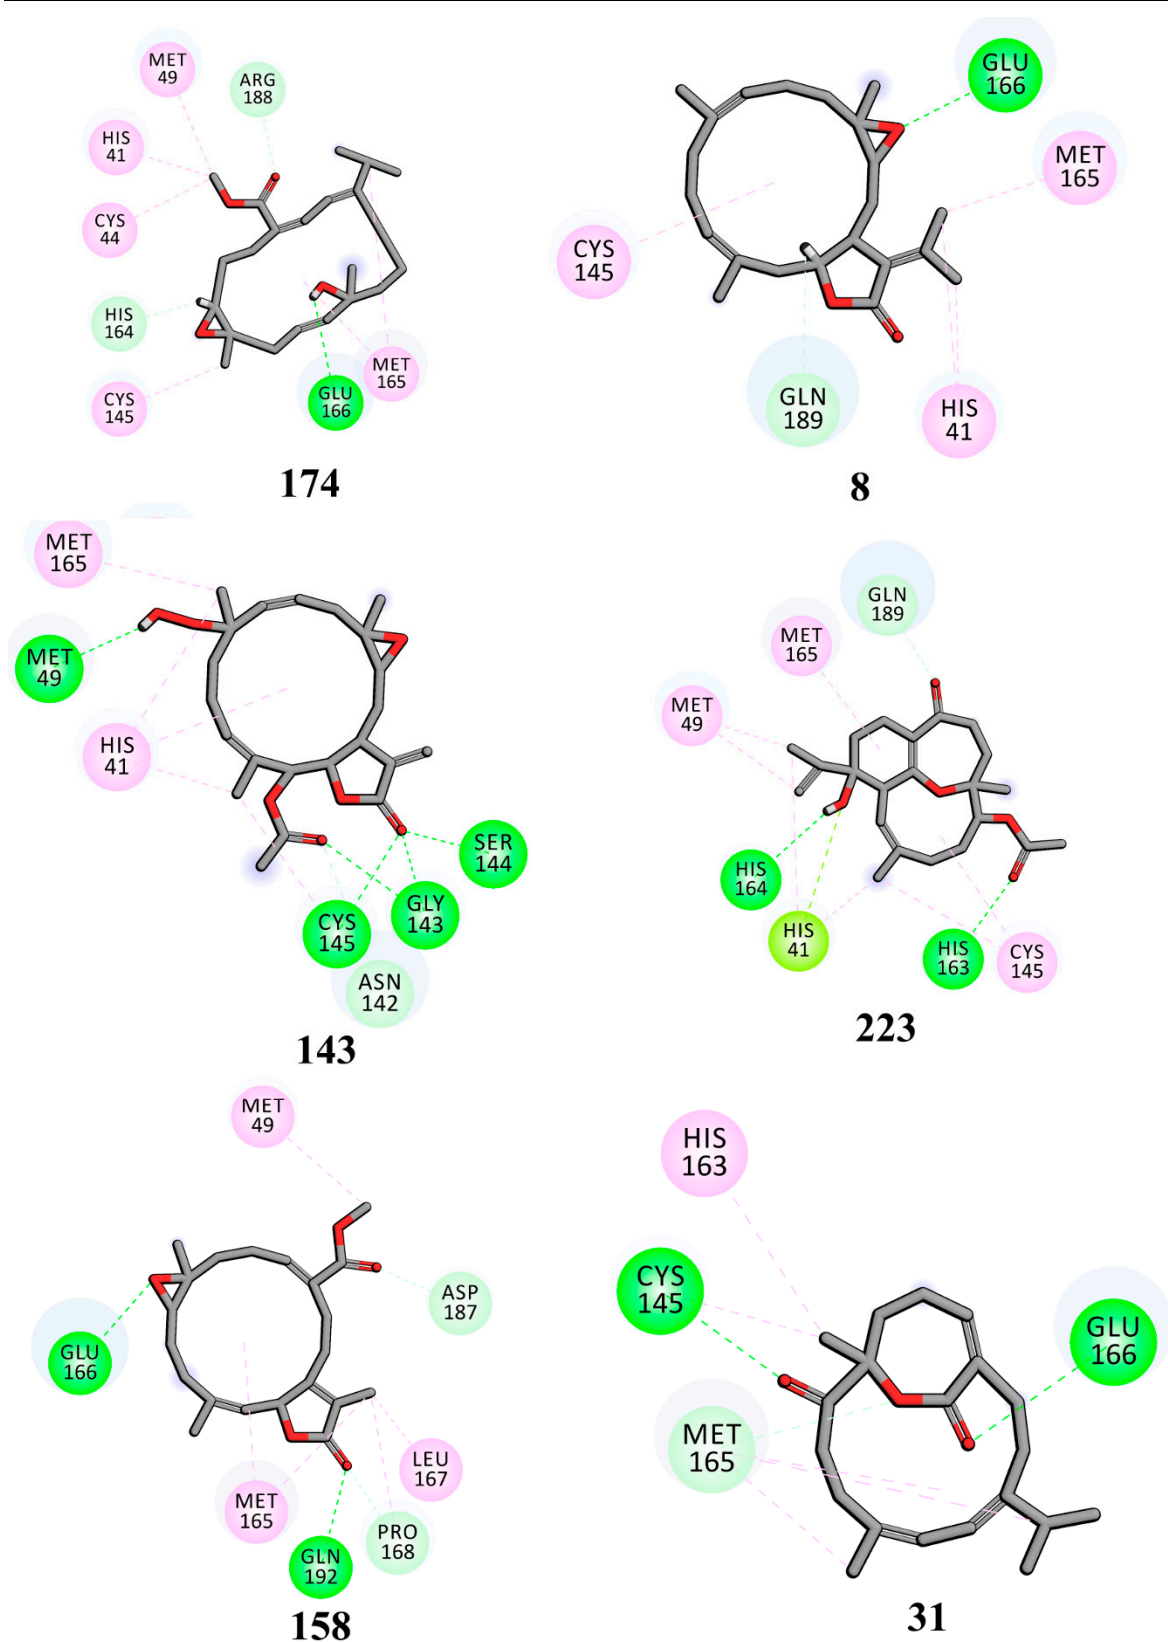

**Figure S1.** *Continued.*

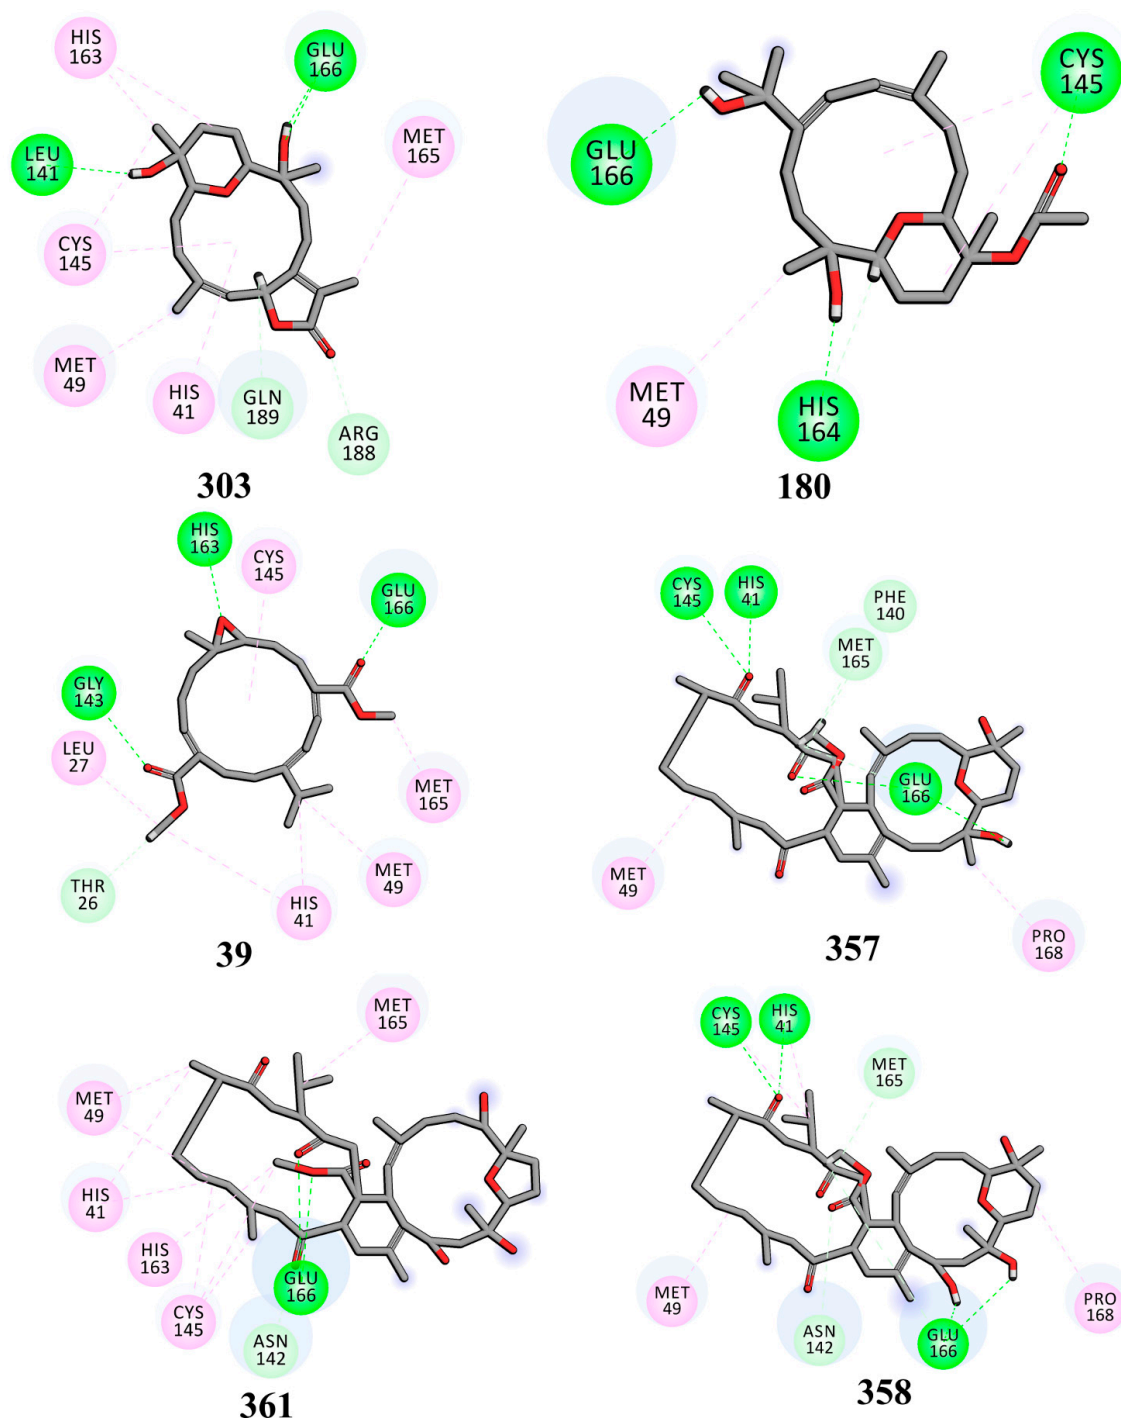

**Figure S1.** *Continued.*

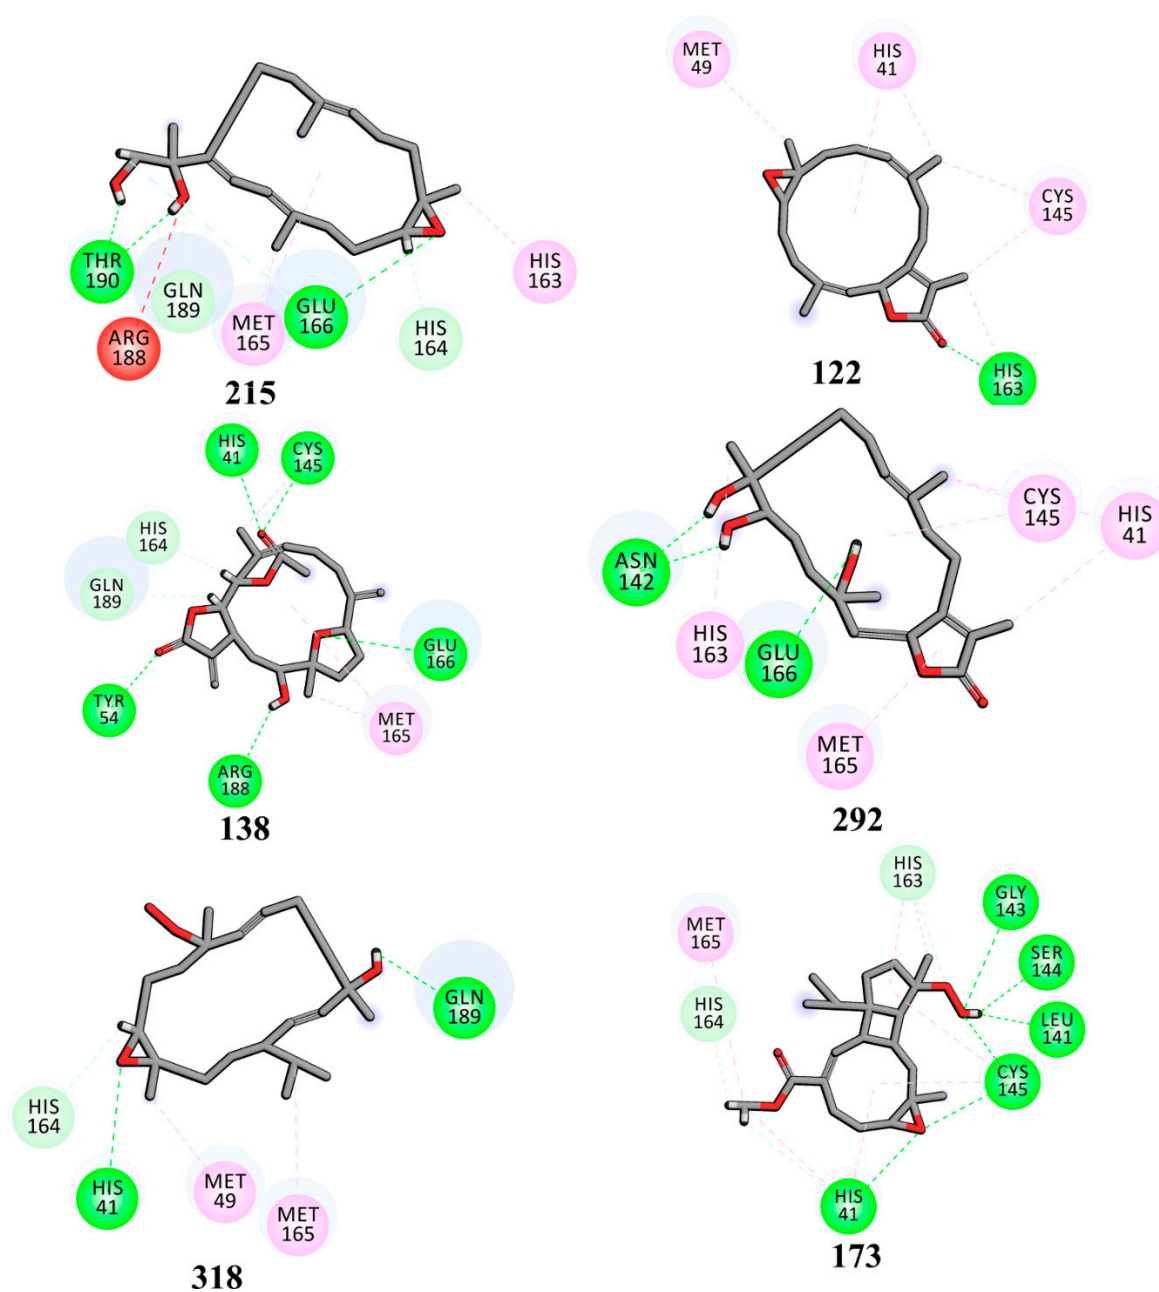

**Figure S1.** *Continued.*

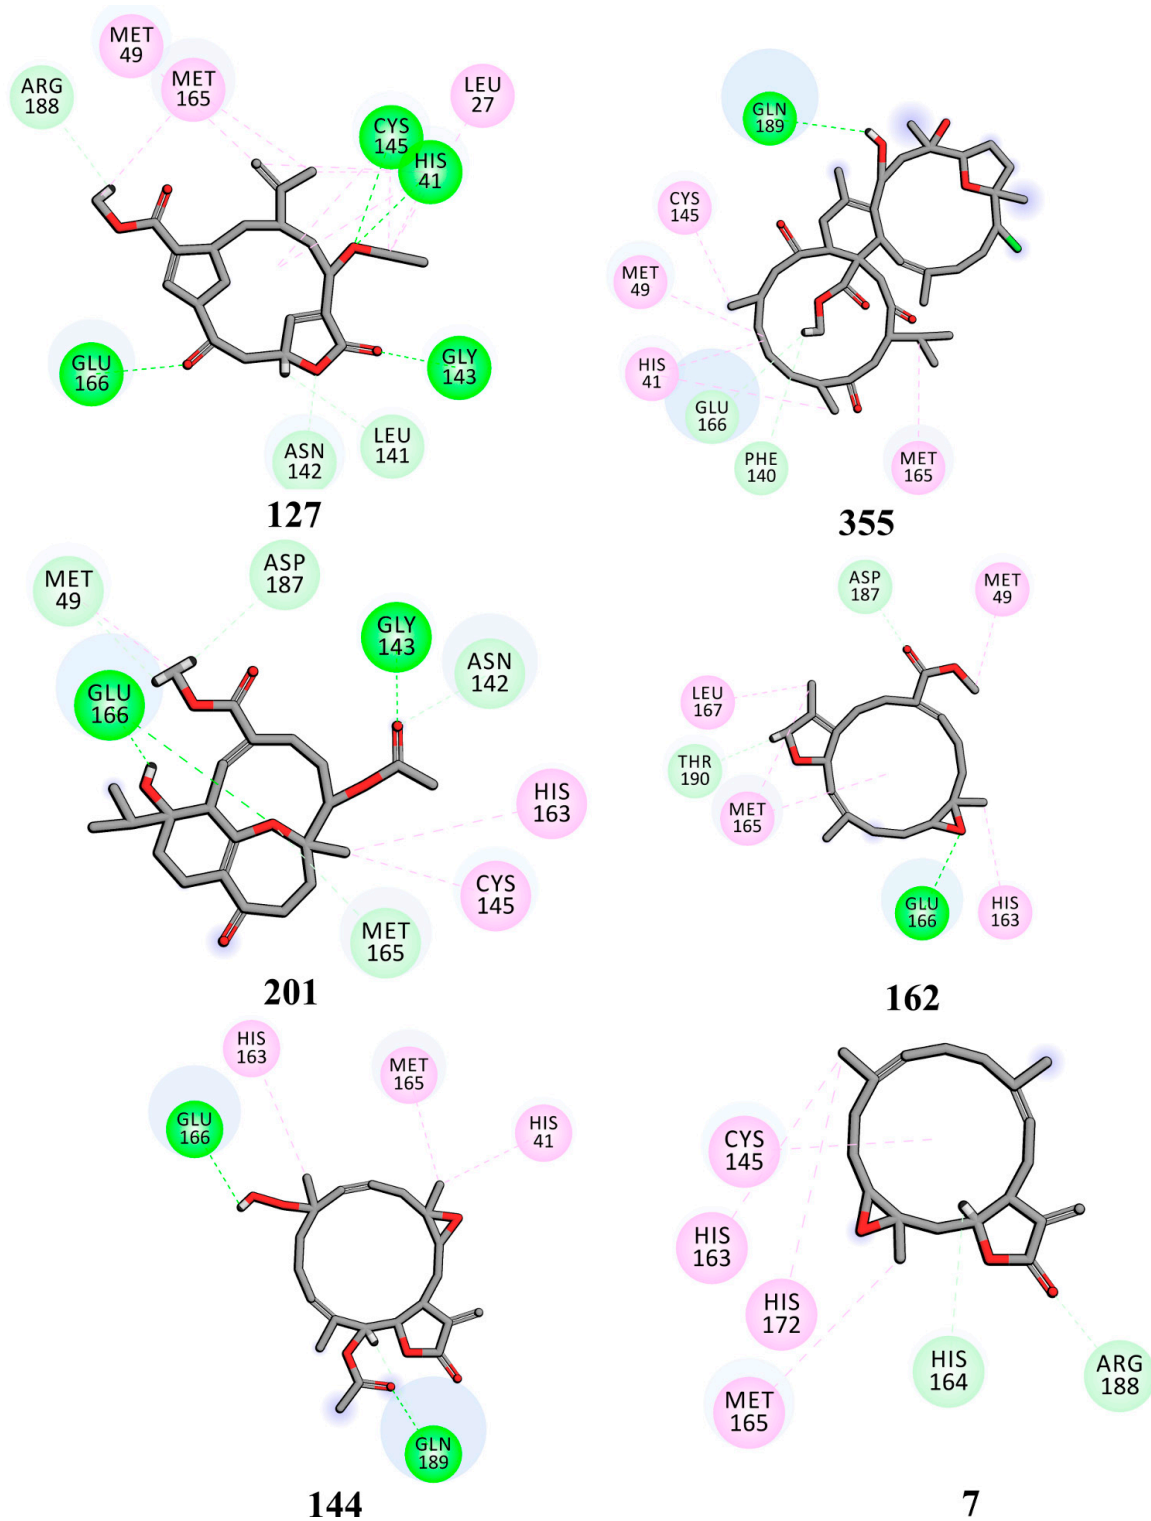

Figure S1. Continued.

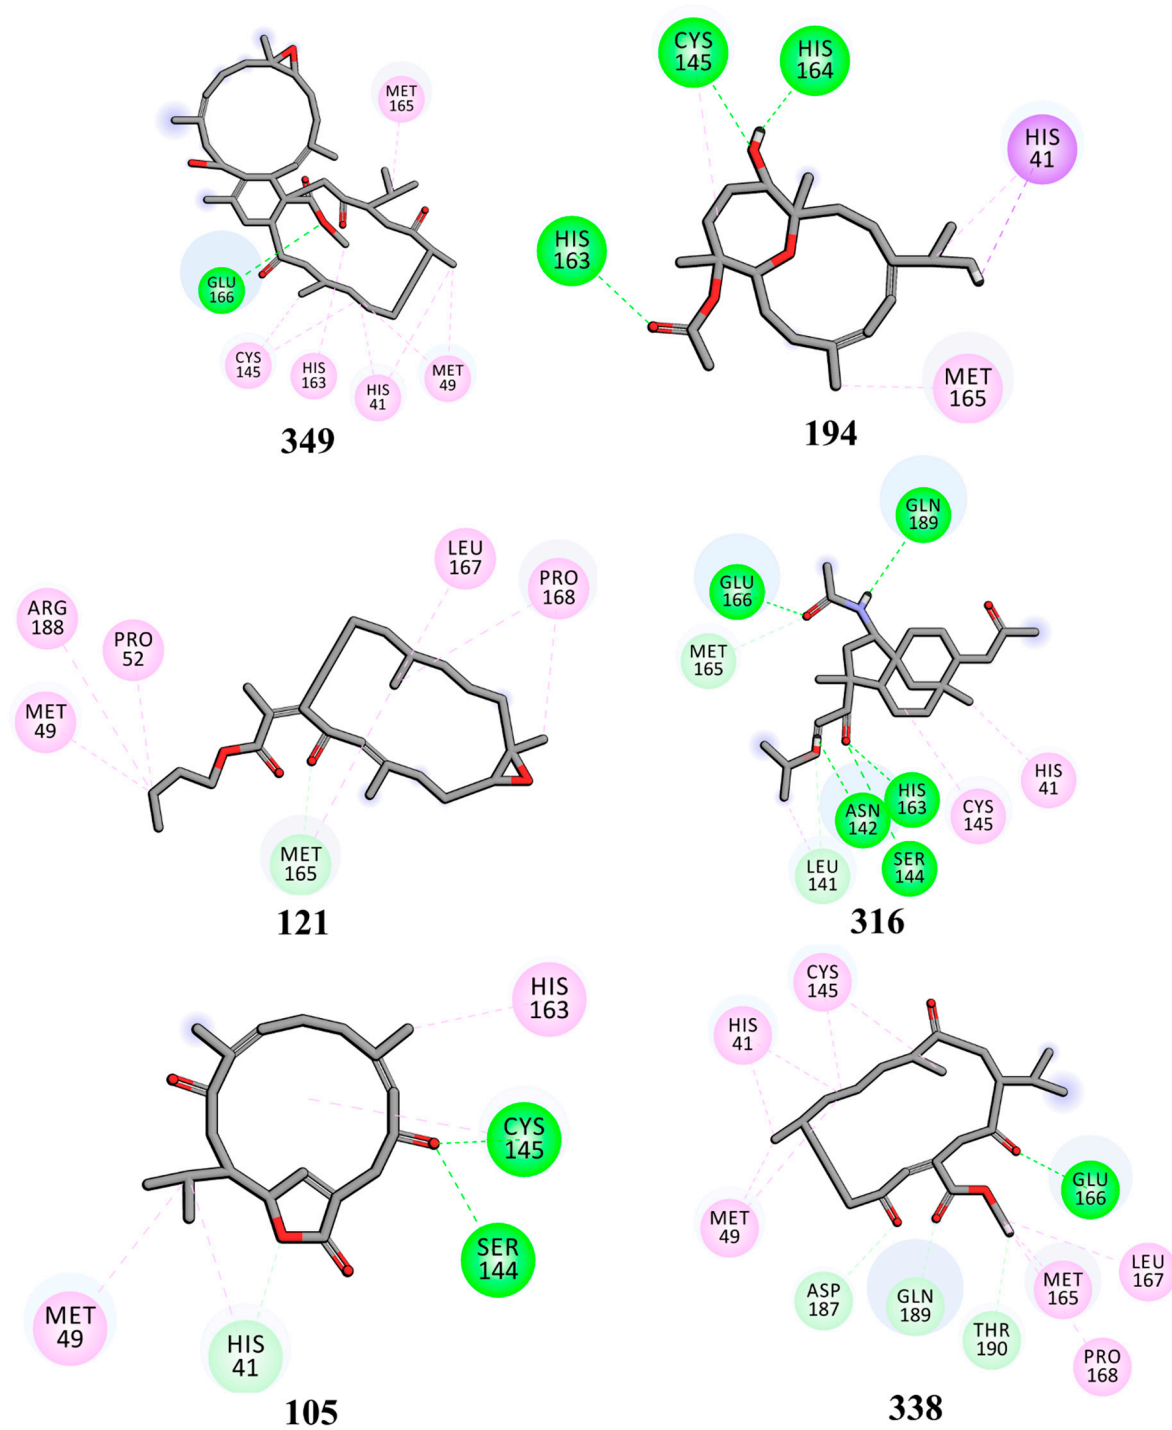

**Figure S1.** *Continued.*

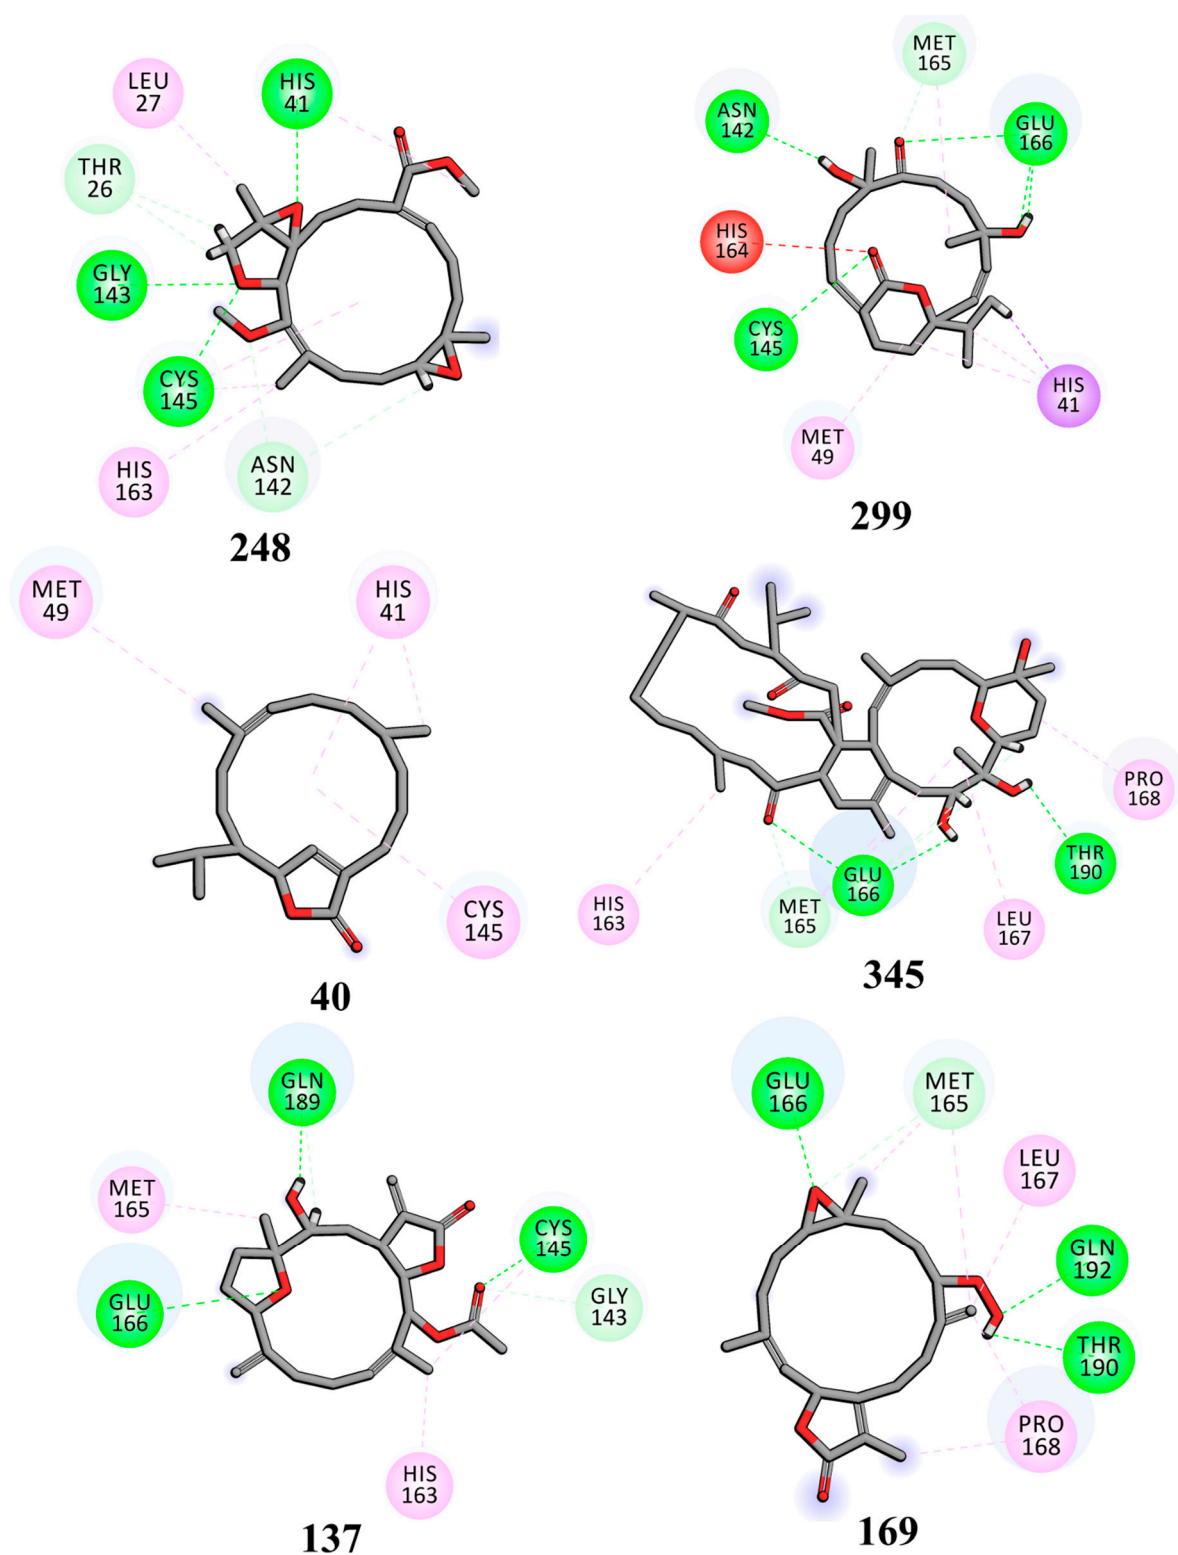

**Figure S1.** *Continued.*

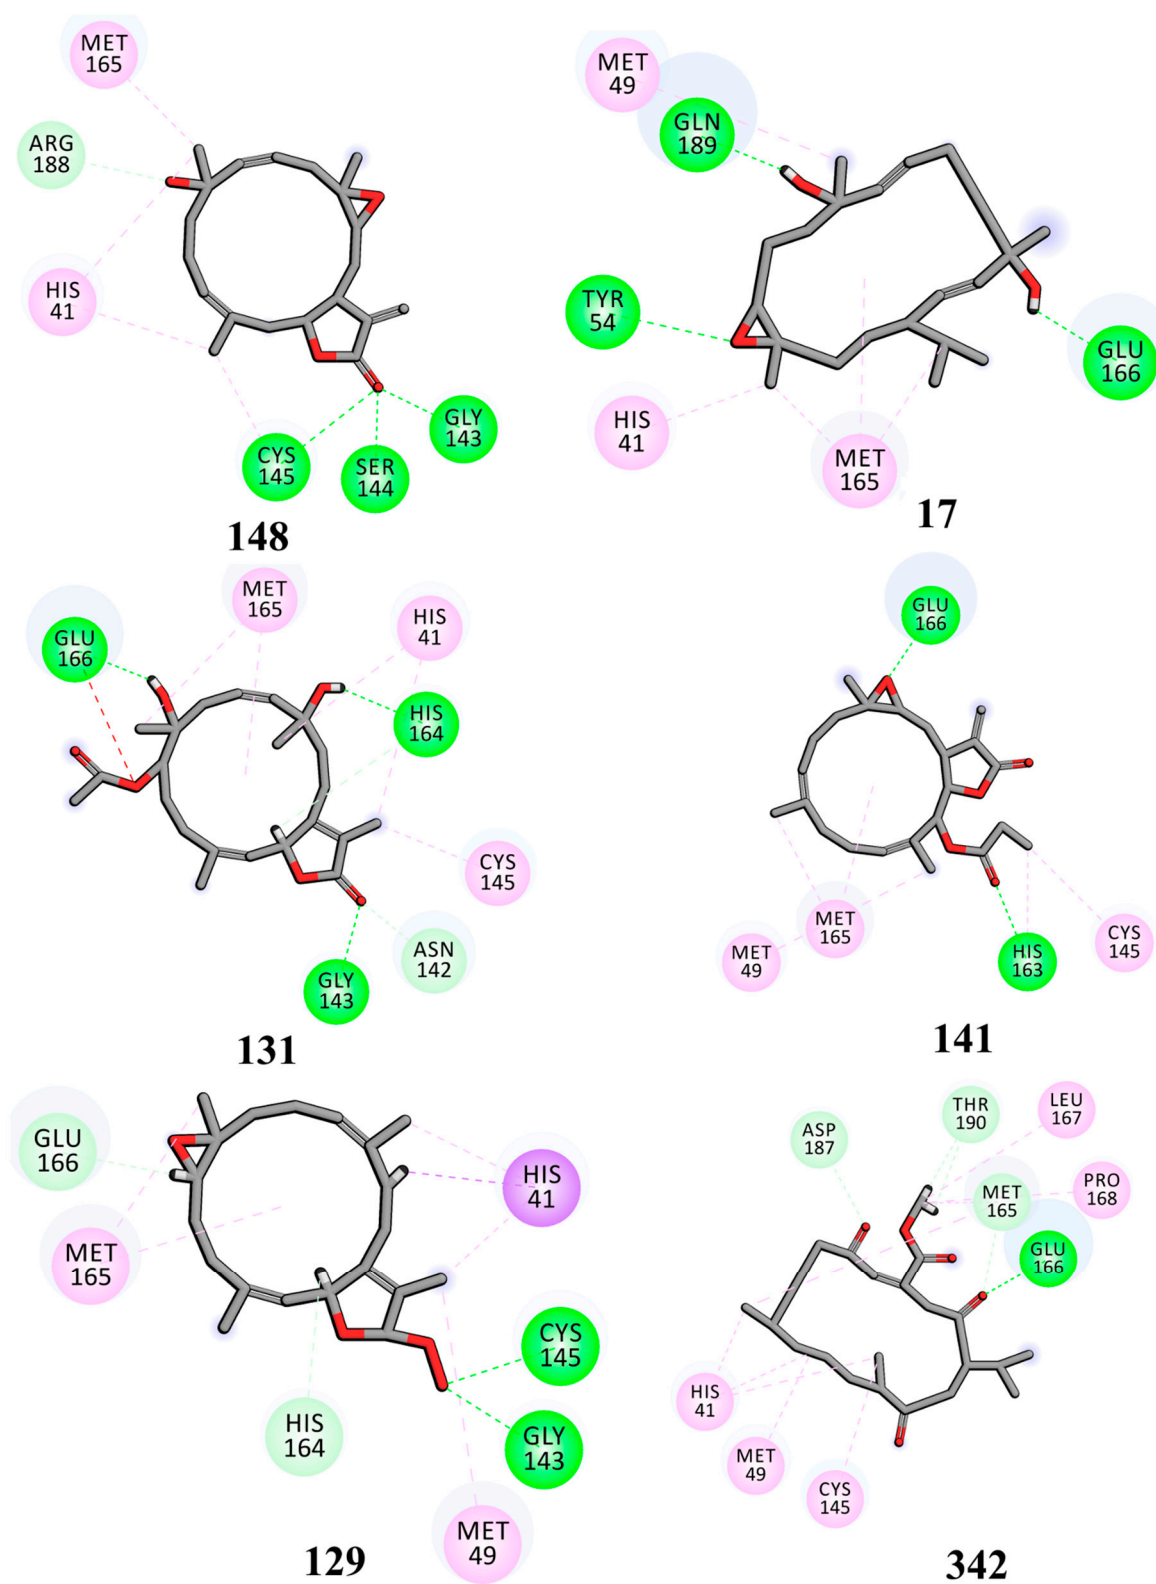

**Figure S1. Continued.**

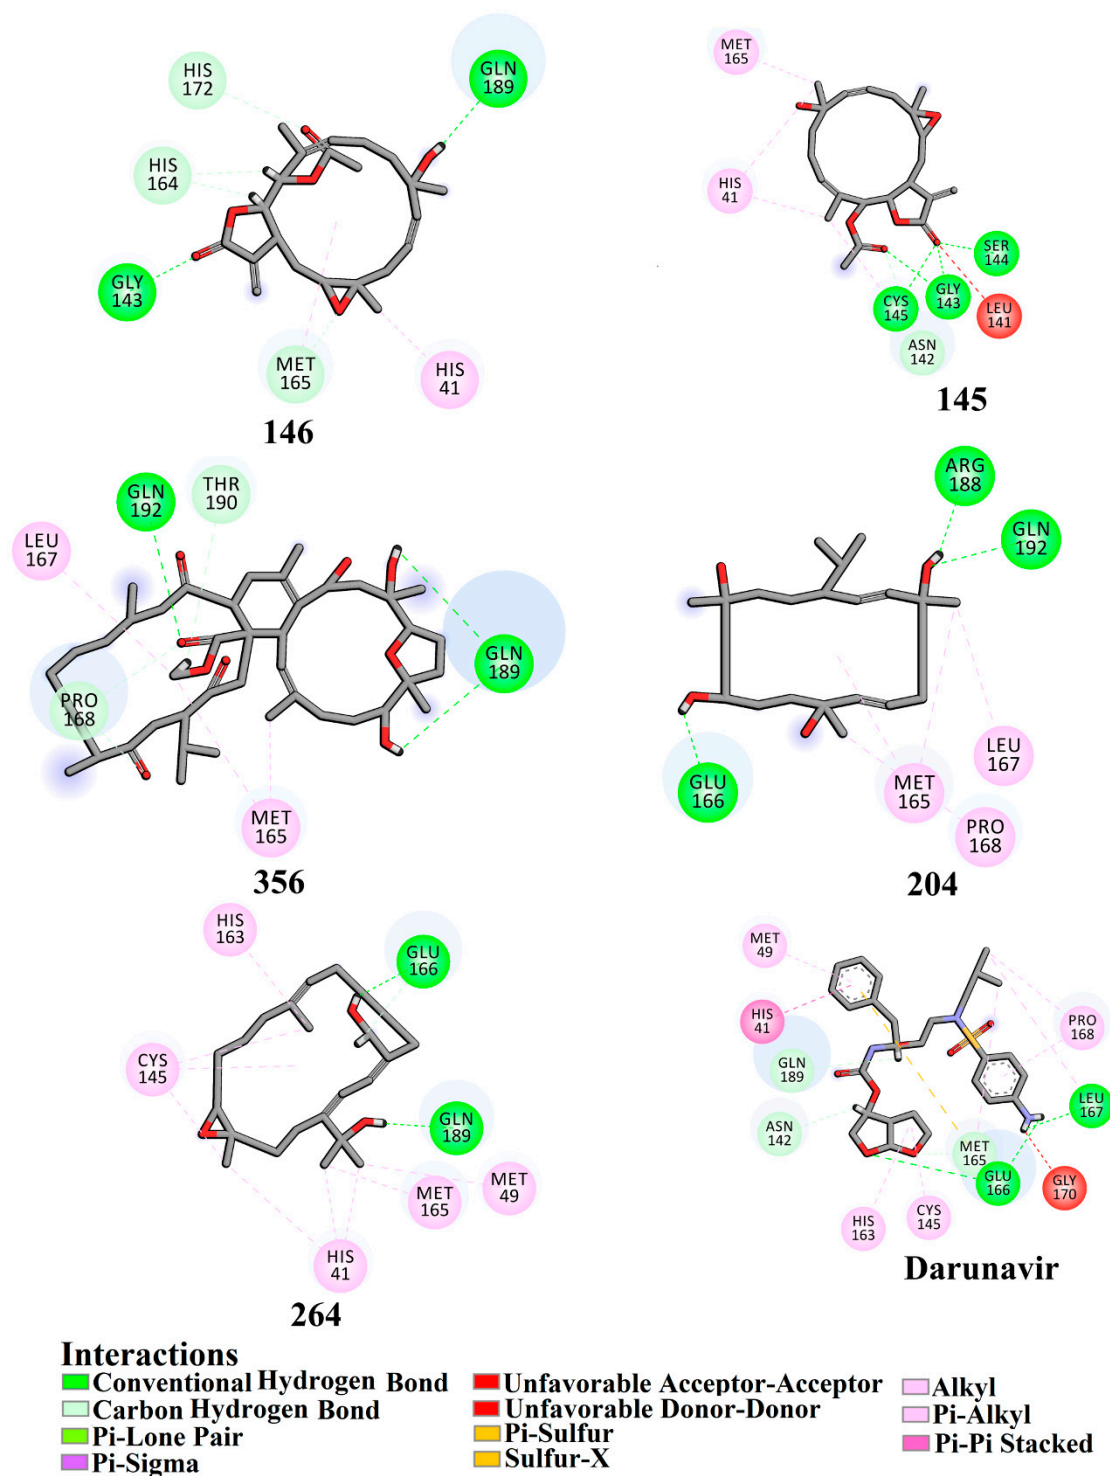

Figure S1. Continued.

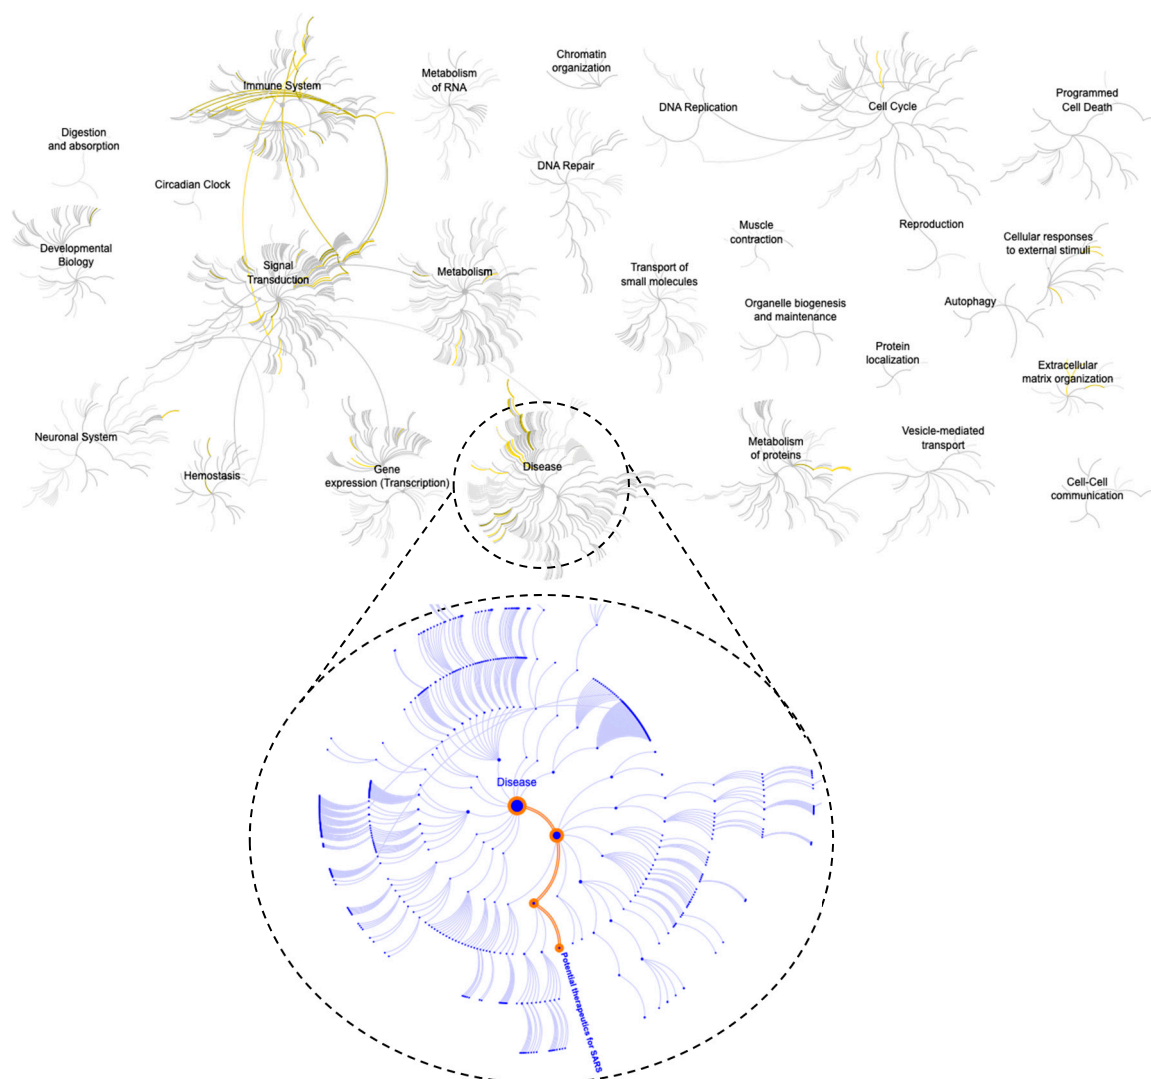

**Figure S2.** A genome-wide overview of the Reactome Pathway Analysis (RPA) results for the top 20 genes targets stimulated by bislatumlide A (**340**) against SARS-CoV-2. Pathways are organized in a hierarchy form. The light grey color indicates that these pathways are not significantly over-represented. In comparison, light yellow color indicates that these pathways are significantly over-represented by the input gene dataset.

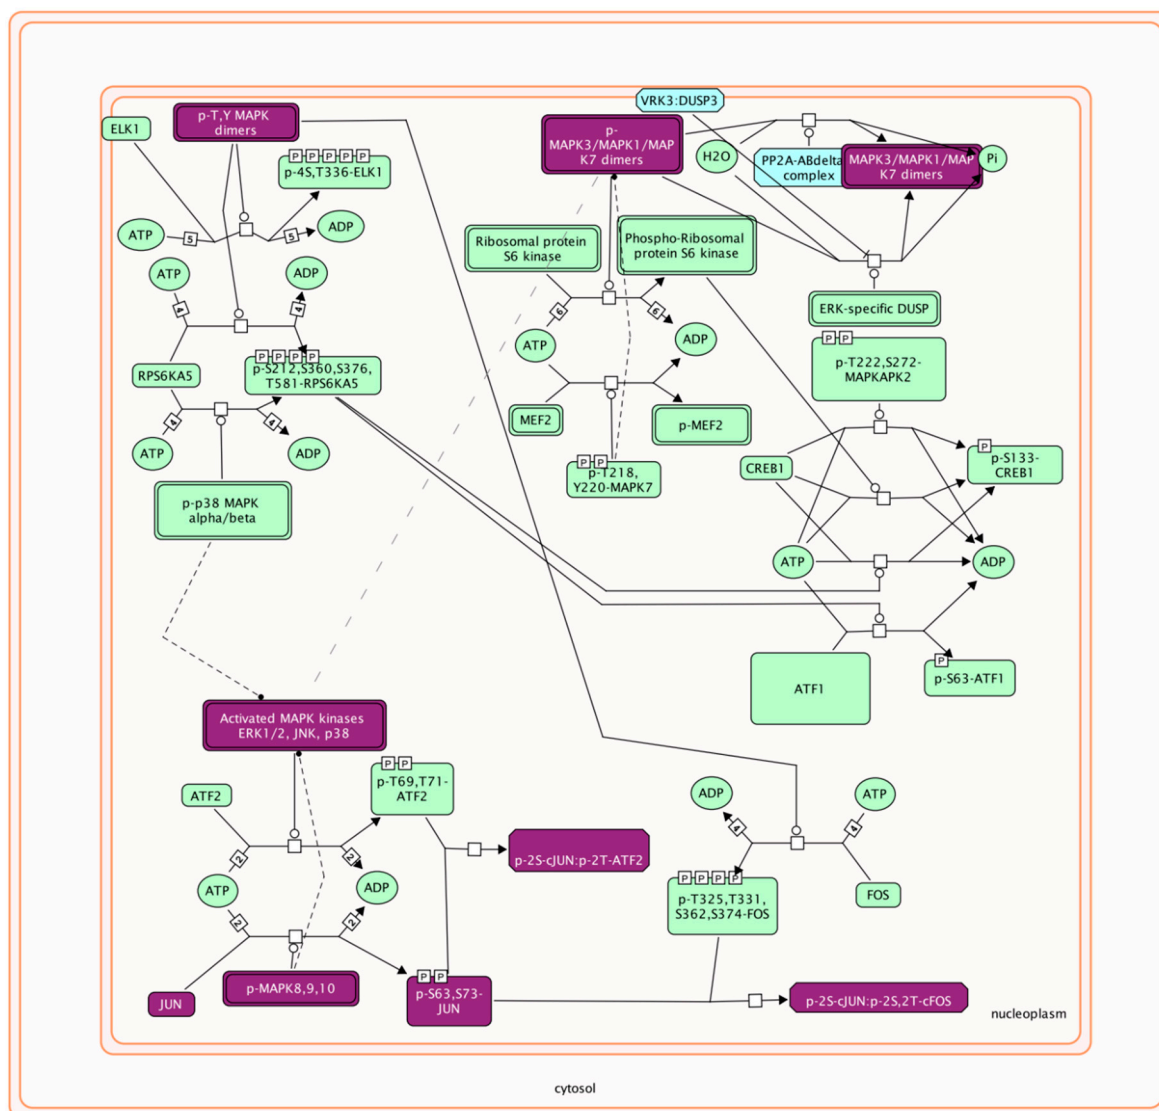

**Figure S3.** Pathway diagram analysis for enzymes/signals of the top 10 genes products/targets (highlighted in red) stimulated by bislatumlide A (340).

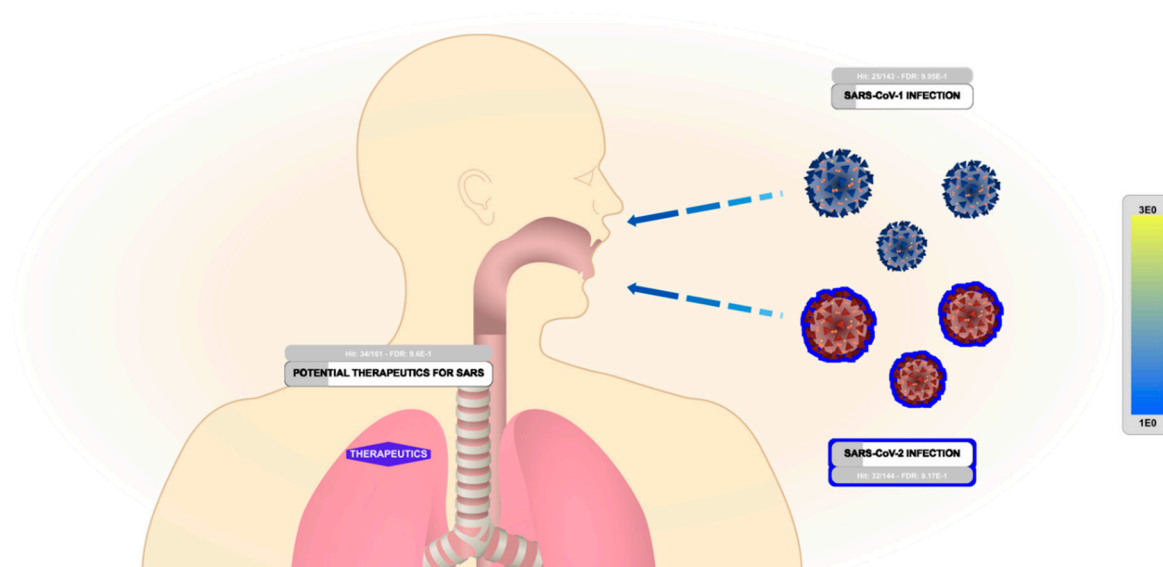

**Figure S4.** A diagrammatic model shows the potential therapeutic level of bislatumlide A (340) against SARS-CoV-2 viral infection.

**Table S1.** Estimated docking score (in kcal/mol) for darunavir and the investigated *Sarcophyton* cembranoid diterpenes metabolites towards SARS-CoV-2 main protease (M<sup>pro</sup>)<sup>a</sup>.

| No. | Compound Name                                                         | Soft Coral                    | Chemical Structure                                                                   | Docking Score (kcal/mol) |
|-----|-----------------------------------------------------------------------|-------------------------------|--------------------------------------------------------------------------------------|--------------------------|
|     | Darunavir                                                             | -----                         | 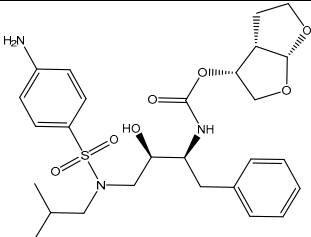   | -8.2                     |
| 1   | Sarcophytol T                                                         | <i>Sarcophyton ehrenbergi</i> |    | -7.7                     |
| 2   | (1E,3E,7E,11R*12R*)-15-(acetoxymethyl)cembra-11,12-epoxy-1,3,7-triene | <i>Sarcophyton ehrenbergi</i> |    | -7.9                     |
| 3   | (11S*,12S*)-15-(acetoxymethyl) cembra-3,4:11,12-diepoxy-1,7-diene     | <i>Sarcophyton ehrenbergi</i> |   | -7.6                     |
| 4   | Isonocembrene A                                                       | <i>Sarcophyton ehrenbergi</i> |  | -7.5                     |
| 5   | Neocembrane A                                                         | <i>Sarcophyton ehrenbergi</i> |  | -7.7                     |
| 6   | (2S*,11R*,12R*)-isosarcophytoxide                                     | <i>Sarcophyton ehrenbergi</i> |  | -8.1                     |
| 7   | Crassolide                                                            | <i>S. crassocaule</i>         |  | -8.5                     |
| 8   | Sarcocrassolide A                                                     | <i>S. crassocaule</i>         |  | -9.0                     |
| 9   | 13-acetoxysarcocrassolide                                             | <i>S. crassocaule</i>         |  | -7.4                     |

|    |                                                            |                                                 |                                                                                      |      |
|----|------------------------------------------------------------|-------------------------------------------------|--------------------------------------------------------------------------------------|------|
| 10 | Denticulatolide                                            | <i>S. crassocaule</i><br><i>Sarcophyton</i> sp. | 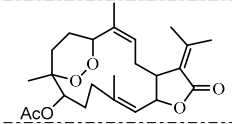   | -9.9 |
| 11 | 7,8-epoxy-1(E),3(E),11(E)cembratrien-15-ol                 | <i>S. trocheliophorum</i>                       |    | -7.8 |
| 12 | 7,8-epoxy1(E),3(E),11(E)-cembratriene                      | <i>S. trocheliophorum</i>                       |    | -7.6 |
| 13 | Sarcophin                                                  | <i>S. trocheliophorum</i>                       |    | -7.1 |
| 14 | Acutanol                                                   | <i>S. acutangulum</i>                           |    | -7.8 |
| 15 | Sarcophytol A                                              | <i>S. acutangulum</i>                           |    | -7.5 |
| 16 | Sarcophytol A acetate                                      | <i>S. infundibuliforme</i>                      |   | -7.0 |
| 17 | (1S,2E,4R,6E,8S,11S,12S)-11,12-Epoxy-2,6-cembrane-4,8-diol | <i>Sarcophyton</i> sp.                          |  | -8.3 |
| 18 | (1S,2E,4R,6E,8R,11S,12S)-11,12-Epoxy-2,6-cembrane-4,8-diol | <i>Sarcophyton</i> sp.                          |  | -8.2 |
| 19 | (1S,2E,4R,7S)-11,12-Epoxy-2,8(19)-cembradiene-4,7-diol     | <i>Sarcophyton</i> sp.                          |  | -8.2 |
| 20 | (1S,2E,4R,7R)-11,12-Epoxy-2,8(19)-cembradiene-4,7-diol     | <i>Sarcophyton</i> sp.                          |  | -8.1 |
| 21 | Sarcophycrassolide A                                       | <i>S. crassocaule</i>                           |  | -7.9 |

|    |                                                                                                         |                                                |                                                                                      |      |
|----|---------------------------------------------------------------------------------------------------------|------------------------------------------------|--------------------------------------------------------------------------------------|------|
| 22 | Sacophyocrassolide B                                                                                    | <i>S. crassocaule</i>                          | 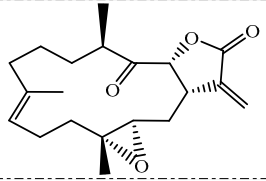   | -7.8 |
| 23 | 13-dehydroxysarcoglaucol                                                                                | <i>S. cherbonnieri</i>                         |    | -7.4 |
| 24 | 13-dehydroxysarcoglaucol-16-one                                                                         | <i>S. cherbonnieri</i>                         |    | -8.1 |
| 25 | Sarcoglaucol-16-one                                                                                     | <i>S. cherbonnieri</i><br><i>S. ehrenbergi</i> |    | -7.8 |
| 26 | (3E)-7-hydroxy-4,8,15,15-tetramethyl-1-[(E)-12-methyl-10-oxo-12-pentenyl]-3,8-decadienyl acetate        | <i>S. cherbonnieri</i>                         |    | -7.4 |
| 27 | (3E)-7-hydroxy-4,8,15,15-tetramethyl-1-[(Z)-12-methyl-10-oxo-12-pentenyl]-3,8-decadienyl acetate        | <i>S. cherbonnieri</i>                         |   | -7.1 |
| 28 | Sarcoglaucol                                                                                            | <i>S. cherbonnieri</i>                         |  | -7.5 |
| 29 | Decaryiol                                                                                               | <i>S. cherbonnieri</i>                         |  | -6.8 |
| 30 | (4Z,8S,9S,12Z,14E)-9-Hydroxy-1-isopropyl-8,12-dimethyl-oxabicyclo [9.3.2]-hexadeca-4,12,14-trien-18-one | <i>Sarcophyton</i><br><i>new sp.</i>           |  | -7.3 |
| 31 | (4Z,12Z,14E)-sarcophytolide                                                                             | <i>Sarcophyton</i><br><i>new sp.</i>           |  | -8.8 |
| 32 | Sarcophytolide                                                                                          | <i>Sarcophyton</i><br><i>new sp.</i>           |  | -7.5 |

|    |                                                                                                           |                            |                                                                                       |      |
|----|-----------------------------------------------------------------------------------------------------------|----------------------------|---------------------------------------------------------------------------------------|------|
| 33 | 4Z,8S,9R,12E,14E)-9-Hydroxy-1-isopropyl-8,12-dimethyloxabicyclo[9.3.2]-hexadeca-4,12,14-trien-18-one      | <i>Sarcophyton new sp.</i> | 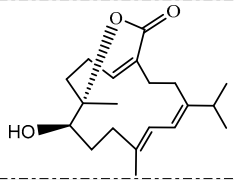    | -7.8 |
| 34 | (4Z,8S,9R,12E,14E)-1-Isopropyl-8,12-dimethyl-18-oxo-oxabicyclo[9.3.2]-hexadeca-4,12,14-trien-2-yl acetate | <i>Sarcophyton new sp.</i> |     | -8.0 |
| 35 | Sarcophytolol                                                                                             | <i>S. glaucum</i>          |     | -7.0 |
| 36 | Sarcophytolide B                                                                                          | <i>S. glaucum</i>          |     | -7.3 |
| 37 | Sarcophytolide C                                                                                          | <i>S. glaucum</i>          |    | -7.9 |
| 38 | Sarcophytonolide A                                                                                        | <i>S. tortuosum</i>        |  | -8.2 |
| 39 | Sarcophytonolide B                                                                                        | <i>S. crassocaule</i>      |  | -8.7 |
| 40 | Sarcophytonolide C                                                                                        | <i>S. tortuosum</i>        |  | -8.4 |
| 41 | Sarcophytonolide D                                                                                        | <i>S. tortuosum</i>        |   | -8.0 |
| 42 | Sarcophytonolide E                                                                                        | <i>S. latum</i>            |   | -7.7 |
| 43 | Sarcophytonolide F                                                                                        | <i>S. latum</i>            |   | -7.9 |

|    |                    |                            |                                                                                       |      |
|----|--------------------|----------------------------|---------------------------------------------------------------------------------------|------|
| 44 | Sarcophytonolide G | <i>S. latum</i>            | 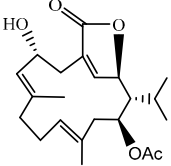   | -7.8 |
| 45 | Sarcophytonolide H | <i>S. latum</i>            |    | -8.0 |
| 46 | Sarcophytonolide I | <i>S. latum</i>            |    | -7.7 |
| 47 | Sarcophytonolide J | <i>S. infundibuliforme</i> |    | -7.5 |
| 48 | Sarcophytonolide K | <i>S. trocheliophorum</i>  |   | -8.1 |
| 49 | Sarcophytonolide L | <i>S. latum</i>            |  | -7.6 |
| 50 | Sarcophytonolide N | <i>S. trocheliophorum</i>  |  | -7.3 |
| 51 | Sarcophytonolide O | <i>S. trocheliophorum</i>  |  | -8.2 |
| 52 | Sarcophytonolide P | <i>S. trocheliophorum</i>  |  | -8.2 |
| 53 | Sarcophytonolide Q | <i>S. trocheliophorum</i>  |  | -8.2 |
| 54 | Sarcophytonolide R | <i>S. trocheliophorum</i>  |  | -7.3 |

|    |                                                                   |                                     |                                                                                      |      |
|----|-------------------------------------------------------------------|-------------------------------------|--------------------------------------------------------------------------------------|------|
| 55 | ketoemblide                                                       | <i>S.</i><br><i>trocheliophorum</i> | 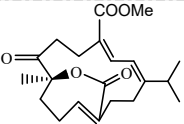   | -8.2 |
| 56 | (E,E,E)-1-isopropenyl-4,8,12-trimethylcyclotetradeca-3,7,11-tiene | <i>S.</i><br><i>trocheliophorum</i> |   | -7.7 |
| 57 | Sarcophytonolide S                                                | <i>S.</i><br><i>trocheliophorum</i> |    | -7.9 |
| 58 | Sarcophytonolide T                                                | <i>S.</i><br><i>trocheliophorum</i> |    | -8.1 |
| 59 | Sarcophytonolide U                                                | <i>S.</i><br><i>trocheliophorum</i> |    | -8.1 |
| 60 | Sartrolide H                                                      | <i>S.</i><br><i>trocheliophorum</i> |   | -7.4 |
| 61 | Sartrolide I                                                      | <i>S.</i><br><i>trocheliophorum</i> |  | -7.3 |
| 62 | Sartrolide J                                                      | <i>S.</i><br><i>trocheliophorum</i> |  | -7.5 |
| 63 | Sartrolide A                                                      | <i>S.</i><br><i>trocheliophorum</i> |  | -7.0 |
| 64 | Sartrolide B                                                      | <i>S.</i><br><i>trocheliophorum</i> |  | -7.3 |
| 65 | Sartrolide C                                                      | <i>S.</i><br><i>trocheliophorum</i> |  | -6.7 |
| 66 | Sartrolide D                                                      | <i>S.</i><br><i>trocheliophorum</i> |  | -7.9 |
| 67 | Sartrolide E                                                      | <i>S.</i><br><i>trocheliophorum</i> |  | -7.5 |

|    |                       |                           |                                                                                      |      |
|----|-----------------------|---------------------------|--------------------------------------------------------------------------------------|------|
| 68 | Sartrolide F          | <i>S. trocheliophorum</i> | 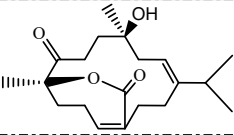   | -7.6 |
| 69 | Sartrolide G          | <i>S. trocheliophorum</i> |    | -8.2 |
| 70 | Bissartrolide dimer   | <i>S. trocheliophorum</i> |    | -8.1 |
| 71 | Yalongene A           | <i>S. trocheliophorum</i> |    | -8.0 |
| 72 | Yalongene A           | <i>S. trocheliophorum</i> |   | -6.5 |
| 73 | Trochelioid A         | <i>S. trocheliophorum</i> |  | -7.8 |
| 74 | Trochelioid B         | <i>S. trocheliophorum</i> |  | -8.1 |
| 75 | 16-oxosarcophytonin E | <i>S. trocheliophorum</i> |  | -7.5 |
| 76 | Sarcassin A           | <i>S. crassocaule</i>     |  | -8.2 |
| 77 | Sarcassin B           | <i>S. crassocaule</i>     |  | -6.4 |
| 78 | Sarcassin C           | <i>S. crassocaule</i>     |  | -7.8 |
| 79 | Sarcassin D           | <i>S. crassocaule</i>     |  | -8.2 |

|    |                |                                              |                                                                                      |      |
|----|----------------|----------------------------------------------|--------------------------------------------------------------------------------------|------|
| 80 | Sarcassin E    | <i>S. crassocaule</i>                        | 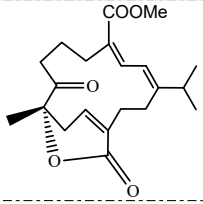   | -8.1 |
| 81 | Emblide        | <i>S. crassocaule</i><br><i>S. tortuosum</i> |    | -8.2 |
| 82 | Crassocolide A | <i>S. crassocaule</i>                        |    | -8.1 |
| 83 | Crassocolide B | <i>S. crassocaule</i>                        |    | -7.4 |
| 84 | Crassocolide C | <i>S. crassocaule</i>                        |   | -6.5 |
| 85 | Crassocolide D | <i>S. crassocaule</i>                        |  | -7.7 |
| 86 | Crassocolide E | <i>S. crassocaule</i>                        |  | -8.2 |
| 87 | Crassocolide F | <i>S. crassocaule</i>                        |  | -8.1 |
| 88 | Lobophytolide  | <i>S. crassocaule</i>                        |  | -7.5 |
| 89 | Crassocolide G | <i>S. crassocaule</i>                        |  | -6.3 |

|     |                |                       |                                                                                      |      |
|-----|----------------|-----------------------|--------------------------------------------------------------------------------------|------|
| 90  | Crassocolide H | <i>S. crassocaule</i> | 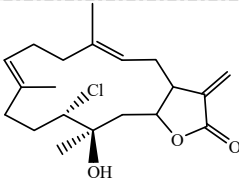   | -7.0 |
| 91  | Crassocolide I | <i>S. crassocaule</i> |    | -7.0 |
| 92  | Crassocolide J | <i>S. crassocaule</i> |    | -7.7 |
| 93  | Crassocolide K | <i>S. crassocaule</i> |    | -8.1 |
| 94  | Crassocolide L | <i>S. crassocaule</i> |   | -8.0 |
| 95  | Crassocolide M | <i>S. crassocaule</i> |  | -7.7 |
| 96  | Crassocolide N | <i>S. crassocaule</i> |  | -7.6 |
| 97  | Crassocolide O | <i>S. crassocaule</i> |  | -8.1 |
| 98  | Crassocolide P | <i>S. crassocaule</i> |  | -8.1 |
| 99  | Flexusine A    | <i>S. flexuosum</i>   |  | -7.4 |
| 100 | Flexusine B    | <i>S. flexuosum</i>   |  | -8.1 |

|     |                                                                   |                        |                                                                                      |      |
|-----|-------------------------------------------------------------------|------------------------|--------------------------------------------------------------------------------------|------|
| 101 | Epimukulol                                                        | <i>S. flexuosum</i>    | 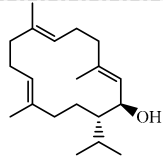  | -7.4 |
| 102 | Sarcostolide A                                                    | <i>S. stolidotum</i>   |    | -8.2 |
| 103 | Sarcostolide B                                                    | <i>S. stolidotum</i>   |    | -8.2 |
| 104 | Sarcostolide C                                                    | <i>S. stolidotum</i>   |    | -8.0 |
| 105 | Sarcostolide D                                                    | <i>S. stolidotum</i>   |   | -8.4 |
| 106 | Sarcostolide E                                                    | <i>S. stolidotum</i>   |  | -7.6 |
| 107 | Sarcostolide F                                                    | <i>S. stolidotum</i>   |  | -7.8 |
| 108 | Sarcostolide G                                                    | <i>S. stolidotum</i>   |  | -7.4 |
| 109 | Isosarcophin                                                      | <i>S. stolidotum</i>   |  | -6.9 |
| 110 | (-)-7 $\beta$ -hydroxy-8 $\alpha$ -methoxy-deepoxy-sarcophytoxide | <i>S. mililatensis</i> |  | -6.9 |
| 111 | (+)-7 $\beta$ ,8 $\beta$ -Dihydroxy-deepoxy-sarcophytoxide        | <i>S. mililatensis</i> |  | -6.6 |
| 112 | (-)-17-hydroxysarcophytonin A                                     | <i>S. mililatensis</i> |  | -7.3 |

|     |                                         |                                                                                                              |                                                                                       |      |
|-----|-----------------------------------------|--------------------------------------------------------------------------------------------------------------|---------------------------------------------------------------------------------------|------|
| 113 | Sarcophytol V                           | <i>S. mililatensis</i>                                                                                       | 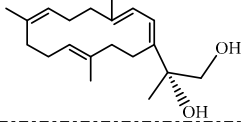    | -6.8 |
| 114 | Sarcophytoxide                          | <i>S. mililatensis</i><br><i>S. glaucum</i><br><i>Sarcophyton</i> sp.<br><i>S.</i><br><i>trocheliophorum</i> |     | -6.9 |
| 115 | 17-hydroxysarcophytoxide                | <i>S. glaucum</i>                                                                                            |     | -6.7 |
| 116 | 7β-acetoxy-8α-hydroxydeepoxysarcophine  | <i>S. glaucum</i>                                                                                            |     | -7.6 |
| 117 | 7α,8βDihydroxydeepoxysarcophine         | <i>S. elegans</i><br><i>S. auritum</i><br><i>S. glaucum</i>                                                  |     | -7.2 |
| 118 | Sarcophytonin A                         | <i>S. mililatensis</i>                                                                                       |   | -6.8 |
| 119 | (-)-β-Elemene                           | <i>Sarcophyton</i> sp.                                                                                       |  | -4.3 |
| 120 | (7R,8S)-dihydroxydeepoxy-ent-sarcophine | <i>S. glaucum</i>                                                                                            |   | -7.5 |
| 121 | Secosarcophinolide                      | <i>S. glaucum</i>                                                                                            |   | -8.4 |
| 122 | Ent-sarcophine                          | <i>S. glaucum</i>                                                                                            |   | -8.6 |
| 123 | (7S,8R)-dihydroxydeepoxysarcophine      | <i>S. glaucum</i>                                                                                            |   | -7.2 |
| 124 | 5-epi-sinuleptolide                     | <i>Sarcophyton</i> sp.                                                                                       |   | -7.3 |

|     |                                  |                                  |                                                                                      |      |
|-----|----------------------------------|----------------------------------|--------------------------------------------------------------------------------------|------|
| 125 | Lobohedleolide                   | <i>Sarcophyton</i><br><i>sp.</i> | 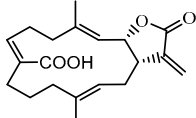   | -8.2 |
| 126 | (7Z)-lobohedleolide              | <i>Sarcophyton</i><br><i>sp.</i> |    | -8.2 |
| 127 | Sarcofuranocembrenolide A        | <i>Sarcophyton</i><br><i>sp.</i> |    | -8.5 |
| 128 | Sarcofuranocembrenolide B        | <i>Sarcophyton</i><br><i>sp.</i> |    | -7.7 |
| 129 | Sarcophytonins F                 | <i>Sarcophyton</i><br><i>sp.</i> |    | -8.3 |
| 130 | Sarcophytonin G                  | <i>Sarcophyton</i><br><i>sp.</i> |   | -6.9 |
| 131 | 7-Acetyl-8-epi- sinumaximol G    | <i>S. ehrenbergi</i>             |  | -8.3 |
| 132 | 8-epi-sinumaximol G              | <i>Sarcophyton</i><br><i>sp.</i> |  | -7.9 |
| 133 | 12-acetyl-7, 12-episinumaximol G | <i>Sarcophyton</i><br><i>sp.</i> |  | -8.0 |
| 134 | 12-hydroxysarcoph-10-ene         | <i>S. ehrenbergi</i>             |  | -7.7 |
| 135 | 8-hydroxy-epi-sarcophinone       | <i>S. ehrenbergi</i>             |  | -7.3 |
| 136 | Sinumaximol G                    | <i>S. ehrenbergi</i>             |  | -7.4 |
| 137 | Sarcocrassocolide A              | <i>S. crassocaule</i>            |  | -8.3 |

|     |                     |                       |                                                                                      |      |
|-----|---------------------|-----------------------|--------------------------------------------------------------------------------------|------|
| 138 | Sarcocrassocolide B | <i>S. crassocaule</i> | 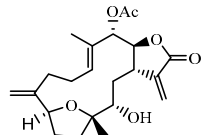   | -8.6 |
| 139 | Sarcocrassocolide C | <i>S. crassocaule</i> |    | -8.2 |
| 140 | Sarcocrassocolide D | <i>S. crassocaule</i> |    | -8.1 |
| 141 | Sarcocrassocolide E | <i>S. crassocaule</i> |    | -8.3 |
| 142 | Sinularolide        | <i>S. crassocaule</i> |    | -7.9 |
| 143 | Sarcocrassocolide F | <i>S. crassocaule</i> |   | -9.0 |
| 144 | Sarcocrassocolide G | <i>S. crassocaule</i> |  | -8.5 |
| 145 | Sarcocrassocolide H | <i>S. crassocaule</i> |  | -8.3 |
| 146 | Sarcocrassocolide I | <i>S. crassocaule</i> |  | -8.3 |
| 147 | Sarcocrassocolide J | <i>S. crassocaule</i> |  | -9.1 |
| 148 | Sarcocrassocolide K | <i>S. crassocaule</i> |  | -8.3 |
| 149 | Sarcocrassocolide L | <i>S. crassocaule</i> |  | -8.1 |
| 150 | Sarcocrassocolide M | <i>S. crassocaule</i> |  | -7.5 |

|     |                                       |                       |                                                                                      |      |
|-----|---------------------------------------|-----------------------|--------------------------------------------------------------------------------------|------|
| 151 | Sarcocrassocolide N                   | <i>S. crassocaule</i> | 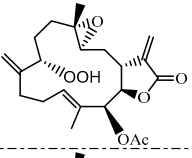   | -9.4 |
| 152 | Sarcocrassocolide O                   | <i>S. crassocaule</i> |    | -7.5 |
| 153 | Sarcocrassocolide P                   | <i>S. crassocaule</i> |    | -7.1 |
| 154 | Sarcocrassocolide Q                   | <i>S. crassocaule</i> |    | -7.8 |
| 155 | Sarcocrassocolide R                   | <i>S. crassocaule</i> |    | -7.3 |
| 156 | (+)-7,8-epoxy-7,8-dihydrocembrene C   | <i>S. ehrenbergi</i>  |   | -8.0 |
| 157 | (+)-12-carboxy-11Z-sarcophytoxide     | <i>S. ehrenbergi</i>  |  | -8.0 |
| 158 | (+)-12-methoxycarbonyl-11Z-sarcophine | <i>S. ehrenbergi</i>  |  | -8.9 |
| 159 | Ehrenberoxide A                       | <i>S. ehrenbergi</i>  |  | -8.1 |
| 160 | Ehrenberoxide B                       | <i>S. ehrenbergi</i>  |  | -7.0 |
| 161 | Ehrenberoxide C                       | <i>S. ehrenbergi</i>  |  | -7.2 |

|     |                                     |                                                 |                                                                                      |      |
|-----|-------------------------------------|-------------------------------------------------|--------------------------------------------------------------------------------------|------|
| 162 | Lobophynin C                        | <i>S. ehrenbergi</i>                            | 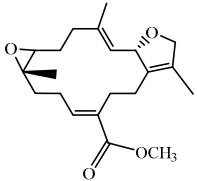   | -8.5 |
| 163 | Cembrene C                          | <i>S. trocheliophorum</i>                       |   | -7.5 |
| 164 | Sarcophytol B                       | <i>Sarcophyton sp.</i>                          |   | -7.9 |
| 165 | Sarcophytol E                       | <i>S. infundibuliforme</i>                      |   | -7.7 |
| 166 | Sarcophytol H                       | <i>S. infundibuliforme</i>                      |    | -7.5 |
| 167 | (-)-marasol                         | <i>S. infundibuliforme</i><br><i>S. glaucum</i> |  | -7.2 |
| 168 | 2R,7R,8R-dihydroxydeepoxysarcophine | <i>S. glaucum</i>                               |  | -7.8 |
| 169 | 11(S)-hydroperoxysarcoph-12(20)-ene | <i>S. glaucum</i>                               |  | -8.3 |
| 170 | 12(S)-hydroperoxysarcoph-10-ene     | <i>S. glaucum</i>                               |  | -8.2 |
| 171 | 8-epi-sarcophinone                  | <i>S. glaucum</i>                               |  | -6.7 |
| 172 | Methyl sarcotroate A                | <i>S. trocheliophorum</i>                       |  | -8.1 |
| 173 | Methyl sarcotroate B                | <i>S. trocheliophorum</i>                       |  | -8.5 |

|     |                                                                |                           |                                                                                       |      |
|-----|----------------------------------------------------------------|---------------------------|---------------------------------------------------------------------------------------|------|
| 174 | Sarcophytonolide M                                             | <i>S. trocheliophorum</i> | 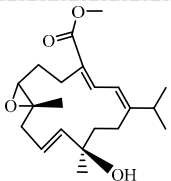   | -9.0 |
| 175 | (1S,2E,4R,6E,8S,11R,12S)-8,11-epoxy-4,12-epoxy-2,6-cembradiene | <i>S. glaucum</i>         |    | -7.6 |
| 176 | (1S,2E,4R,6E,8R,11S,12R)-8,12-epoxy-2,6-cembradiene-4,11-diol  | <i>S. glaucum</i>         |    | -7.7 |
| 177 | (1S,4R,13S)-cembra-2E,7E,11E-trien-4,13-diol                   | <i>S. glaucum</i>         |    | -7.8 |
| 178 | (+)-12-ethoxycarbonyl-11Z-sarcophine                           | <i>S. ehrenbergi</i>      |     | -7.9 |
| 179 | Ehrenbergol A                                                  | <i>S. ehrenbergi</i>      |    | -8.0 |
| 180 | Ehrenbergol B                                                  | <i>S. ehrenbergi</i>      |   | -8.8 |
| 181 | Sarcophylolide B                                               | <i>S. elegans</i>         |  | -7.2 |
| 182 | Sarcophylolide C                                               | <i>S. elegans</i>         |  | -7.8 |
| 183 | Sarcophylolide D                                               | <i>S. elegans</i>         |  | -6.9 |
| 184 | Sarcophylolide E                                               | <i>S. elegans</i>         |   | -7.9 |
| 185 | Sarcophytol L                                                  | <i>S. elegans</i>         |  | -7.2 |

|     |                                                        |                            |                                                                                       |      |
|-----|--------------------------------------------------------|----------------------------|---------------------------------------------------------------------------------------|------|
| 186 | 13 $\alpha$ -hydroxysarcophytol L                      | <i>S. elegans</i>          | 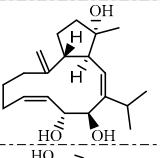   | -7.3 |
| 187 | Sarcophylide A                                         | <i>S. elegans</i>          |     | -9.3 |
| 188 | Sarcophinone                                           | <i>S. elegans</i>          |     | -6.7 |
| 189 | 7 $\alpha$ -hydroxy- $\Delta^8(19)$ -deepoxysarcophine | <i>S. elegans</i>          |     | -7.1 |
| 190 | 4 $\beta$ -hydroxy- $\Delta^2(3)$ -sarcophine          | <i>S. elegans</i>          |     | -7.6 |
| 191 | 1,15 $\beta$ -epoxy-2-epi-16-deoxysarcophine           | <i>S. elegans</i>          |    | -7.6 |
| 192 | Sarcophytol Q                                          | <i>S. elegans</i>          |  | -7.8 |
| 193 | Lobocrasol                                             | <i>S. elegans</i>          |  | -6.6 |
| 194 | Acetyl ehrenberoxide B                                 | <i>S. ehrenbergi</i>       |   | -8.4 |
| 195 | Ehrenbergol C                                          | <i>S. ehrenbergi</i>       |   | -7.4 |
| 196 | Sarcophytol W                                          | <i>S. infundibuliforme</i> |  | -7.5 |
| 197 | (2E,7E)-4,11-dihydroxy-1,12-oxidocembra-2,7-dien       | <i>S. glaucum</i>          |   | -7.5 |

|     |                                                                                       |                        |                                                                                      |      |
|-----|---------------------------------------------------------------------------------------|------------------------|--------------------------------------------------------------------------------------|------|
| 198 | (+)-11,12-epoxy-11,12-dihydrocembrene-C                                               | <i>Sarcophyton sp.</i> | 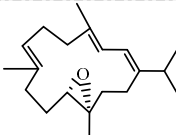   | -7.3 |
| 199 | (+)-11,12-epoxysarcophytol A                                                          | <i>Sarcophyton sp.</i> |    | -7.2 |
| 200 | Sarcolactone A                                                                        | <i>Sarcophyton sp.</i> |    | -7.9 |
| 201 | Tortuosene A                                                                          | <i>S. tortuosum</i>    |    | -8.5 |
| 202 | Tortuosene B                                                                          | <i>S. tortuosum</i>    |    | -8.0 |
| 203 | 2-epi-sarcophine                                                                      | <i>S. auritum</i>      |   | -7.6 |
| 204 | (1R,2E,4S,6E,8R,11R,12R)-2,6-cembradiene-4,8,11,12-tetrol                             | <i>S. auritum</i>      |  | -8.3 |
| 205 | Sarcophyton A                                                                         | <i>Sarcophyton sp.</i> |  | -8.2 |
| 206 | Sarcophyton B                                                                         | <i>Sarcophyton sp.</i> |  | -7.8 |
| 207 | Sarcophyton C                                                                         | <i>Sarcophyton sp.</i> |  | -7.2 |
| 208 | Sarcophyton D                                                                         | <i>Sarcophyton sp.</i> |  | -7.2 |
| 209 | 2-[(E,E,E)-7',80-epoxy-4',8',12'-trimethylcyclotetradeca-1',3',11-trienyl]propan-2-ol | <i>Sarcophyton sp.</i> |  | -8.2 |

|     |                                                                                                          |                                                |                                                                                      |      |
|-----|----------------------------------------------------------------------------------------------------------|------------------------------------------------|--------------------------------------------------------------------------------------|------|
| 210 | (1E,3E,7R*,8R*,11E)-1-(2-methoxy-propan-2-yl)-4,8,12-trimethyloxabicyclo[12.1.0]-pentadeca-1,3,11-triene | <i>Sarcophyton sp.</i>                         | 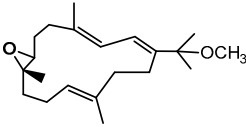   | -7.5 |
| 211 | Crassumol C                                                                                              | <i>Sarcophyton sp.</i>                         |    | -7.4 |
| 212 | Laevigatol A                                                                                             | <i>Sarcophyton sp.</i>                         |    | -7.0 |
| 213 | Sarcotrocheliol acetate                                                                                  | <i>S. glaucum</i><br><i>S. trocheliophorum</i> |    | -7.3 |
| 214 | Sarcotrocheliol                                                                                          | <i>S. trocheliophorum</i>                      |    | -7.6 |
| 215 | Sarcophinediol                                                                                           | <i>S. glaucum</i>                              |   | -8.6 |
| 216 | 7-keto-8α-hydroxy-deepoxysarcophine                                                                      | <i>S. ehrenbergi</i>                           |  | -7.8 |
| 217 | 7β-chloro-8α-hydroxy-12-acetoxy-deepoxysarcophine                                                        | <i>S. ehrenbergi</i>                           |  | -7.4 |
| 218 | Dihydrosarsolenone                                                                                       | <i>S. trocheliophorum</i>                      |  | -8.1 |
| 219 | Methyl dihydrosarsolenoneate                                                                             | <i>S. solidum</i>                              |  | -8.1 |

|     |                  |                           |                                                                                      |      |
|-----|------------------|---------------------------|--------------------------------------------------------------------------------------|------|
| 220 | Sarsolilide B    | <i>S. trocheliophorum</i> | 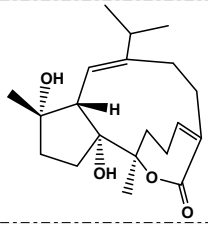   | -7.4 |
| 221 | Sarsolilide C    | <i>S. trocheliophorum</i> |    | -7.1 |
| 222 | Sarsolilide A    | <i>S. solidum</i>         |    | -7.4 |
| 223 | Sarsolenone      | <i>S. solidum</i>         |   | -8.9 |
| 224 | Trocheliophol A  | <i>S. trocheliophorum</i> |  | -7.3 |
| 225 | Trocheliophol B  | <i>S. trocheliophorum</i> |  | -7.4 |
| 226 | Trocheliophols C | <i>S. trocheliophorum</i> |  | -6.8 |
| 227 | Trocheliophol D  | <i>S. trocheliophorum</i> |  | -6.8 |
| 228 | Trocheliophol E  | <i>S. trocheliophorum</i> |  | -6.9 |
| 229 | Trocheliophol F  | <i>S. trocheliophorum</i> |  | -7.4 |

|     |                 |                                                |                                                                                       |      |
|-----|-----------------|------------------------------------------------|---------------------------------------------------------------------------------------|------|
| 230 | Trocheliophol G | <i>S.</i><br><i>trocheliophoru</i><br><i>m</i> | 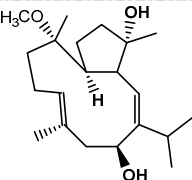    | -7.3 |
| 231 | Trocheliophol H | <i>S.</i><br><i>trocheliophoru</i><br><i>m</i> |    | -7.3 |
| 232 | Trocheliophol I | <i>S.</i><br><i>trocheliophoru</i><br><i>m</i> |    | -6.9 |
| 233 | Trocheliophol J | <i>S.</i><br><i>trocheliophoru</i><br><i>m</i> |     | -7.1 |
| 234 | Trocheliophol K | <i>S.</i><br><i>trocheliophoru</i><br><i>m</i> |  | -7.7 |
| 235 | Trocheliophol L | <i>S.</i><br><i>trocheliophoru</i><br><i>m</i> |  | -7.6 |
| 236 | Trocheliophol M | <i>S.</i><br><i>trocheliophoru</i><br><i>m</i> |   | -6.6 |
| 237 | Trocheliophol N | <i>S.</i><br><i>trocheliophoru</i><br><i>m</i> |   | -6.9 |
| 238 | Trocheliophol O | <i>S.</i><br><i>trocheliophoru</i><br><i>m</i> |  | -6.9 |
| 239 | Trocheliophol P | <i>S.</i><br><i>trocheliophoru</i><br><i>m</i> |  | -7.6 |

|     |                                                               |                           |                                                                                      |      |
|-----|---------------------------------------------------------------|---------------------------|--------------------------------------------------------------------------------------|------|
| 240 | Trocheliophol Q                                               | <i>S. trocheliophorum</i> | 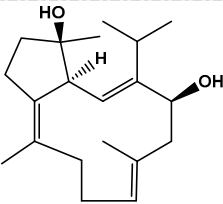   | -6.9 |
| 241 | Trocheliophol R                                               | <i>S. trocheliophorum</i> |    | -6.9 |
| 242 | Trocheliophol S                                               | <i>S. trocheliophorum</i> |    | -6.1 |
| 243 | 4-epi-sarcophytol L                                           | <i>S. elegans</i>         |    | -8.0 |
| 244 | Sarcophelegan A                                               | <i>S. elegans</i>         |   | -7.4 |
| 245 | Sarcophelegan B                                               | <i>S. elegans</i>         |  | -7.5 |
| 246 | Sarcophelegan C                                               | <i>S. elegans</i>         |  | -7.8 |
| 247 | Sarcophelegan D                                               | <i>S. elegans</i>         |  | -7.9 |
| 248 | (+)-1,15-epoxy-2-methoxy-12methoxycarbonyl-11E-sarcophytoxide | <i>S. ehrenbergi</i>      |  | -8.4 |
| 249 | (+)-2-epi-12-methoxycarbonyl-11E-sarcophine                   | <i>S. ehrenbergi</i>      |  | -7.4 |
| 250 | 3,4-epoxyehrenberoxide A                                      | <i>S. ehrenbergi</i>      |  | -6.9 |

|     |                                    |                           |                                                                                      |      |
|-----|------------------------------------|---------------------------|--------------------------------------------------------------------------------------|------|
| 251 | Ehrenbergol D                      | <i>S. ehrenbergi</i>      | 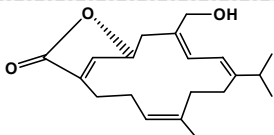   | -6.7 |
| 252 | Ehrenbergol E                      | <i>S. ehrenbergi</i>      |    | -7.7 |
| 253 | 7-deacetyl-sarsolenone             | <i>S. solidum</i>         |    | -8.0 |
| 254 | Trocheliame                        | <i>S. trocheliophorum</i> |   | -6.9 |
| 255 | Sarcotrocheldiol A                 | <i>S. trocheliophorum</i> |  | -8.2 |
| 256 | Sarcotrocheldiol B                 | <i>S. trocheliophorum</i> |  | -6.8 |
| 257 | 16-hydroxycembra-1,3,7,11-tetraene | <i>Sarcophyton sp.</i>    |  | -7.8 |
| 258 | 15-hydroxycembra-1,3,7,11-tetraene | <i>Sarcophyton sp.</i>    |  | -8.0 |
| 259 | Sarcophytol D                      | <i>S. trocheliophorum</i> |  | -7.4 |
| 260 | Sarcophytol E                      | <i>S. trocheliophorum</i> |  | -7.9 |
| 261 | Sarcophytol F                      | <i>S. trocheliophorum</i> |  | -7.2 |

|     |                                                   |                                                |                                                                                      |      |
|-----|---------------------------------------------------|------------------------------------------------|--------------------------------------------------------------------------------------|------|
| 262 | 11,12-epoxy-1(E),3(E), 7(E)-<br>cembratrien-15-ol | <i>S.</i><br><i>trocheliophoru</i><br><i>m</i> | 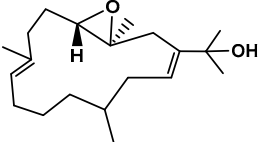   | -7.9 |
| 263 | Sinugibberol                                      | <i>S.</i><br><i>trocheliophoru</i><br><i>m</i> |    | -7.7 |
| 264 | Sarcophytol G                                     | <i>S.</i><br><i>trocheliophoru</i><br><i>m</i> |    | -8.3 |
| 265 | Sarcophytol H                                     | <i>S.</i><br><i>trocheliophoru</i><br><i>m</i> |    | -7.8 |
| 266 | Sarcophytol I                                     | <i>S.</i><br><i>trocheliophoru</i><br><i>m</i> |    | -7.8 |
| 267 | Sarcophytol J                                     | <i>S.</i><br><i>trocheliophoru</i><br><i>m</i> |  | -6.1 |
| 268 | Sarcophytol K                                     | <i>S.</i><br><i>trocheliophoru</i><br><i>m</i> |  | -6.6 |
| 269 | Sarcophytol L                                     | <i>S.</i><br><i>trocheliophoru</i><br><i>m</i> |  | -6.4 |
| 270 | Crassumol A                                       | <i>S.</i><br><i>trocheliophoru</i><br><i>m</i> |  | -8.0 |
| 271 | Sarcophytol M                                     | <i>S.</i><br><i>trocheliophoru</i><br><i>m</i> |  | -7.0 |
| 272 | Sarcophytol N                                     | <i>S.</i><br><i>trocheliophoru</i><br><i>m</i> |  | -7.0 |
| 273 | Sarcostolide O                                    | <i>S.</i><br><i>trocheliophoru</i><br><i>m</i> |  | -7.6 |

|     |                                         |                                    |                                                                                      |      |
|-----|-----------------------------------------|------------------------------------|--------------------------------------------------------------------------------------|------|
| 274 | Sarcophytrol P                          | <i>S.<br/>trocheliophoru<br/>m</i> | 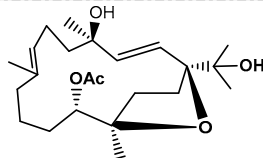   | -6.9 |
| 275 | Sarcophytrol Q                          | <i>S.<br/>trocheliophoru<br/>m</i> |    | -7.5 |
| 276 | Sarcophytrols R                         | <i>S.<br/>trocheliophoru<br/>m</i> |    | -7.4 |
| 277 | Sarcophytrol S                          | <i>S.<br/>trocheliophoru<br/>m</i> |    | -6.5 |
| 278 | Sarcophytrol T                          | <i>S.<br/>trocheliophoru<br/>m</i> |   | -7.0 |
| 279 | Sarcophytrol U                          | <i>S.<br/>trocheliophoru<br/>m</i> |  | -8.0 |
| 280 | Trocheliolide B                         | <i>S.<br/>trocheliophoru<br/>m</i> |  | -7.0 |
| 281 | 9-Hydroxy-10,11-dehydro-sarcotrocheliol | <i>S.<br/>trocheliophoru<br/>m</i> |  | -7.7 |
| 282 | Sarcophytonoxide A                      | <i>S. ehrenbergi</i>               |  | -7.3 |
| 283 | Sarcophytonoxide B                      | <i>S. ehrenbergi</i>               |  | -7.9 |

|     |                                                                    |                           |                                                                                      |      |
|-----|--------------------------------------------------------------------|---------------------------|--------------------------------------------------------------------------------------|------|
| 284 | Sarcophytonoxide C                                                 | <i>S. ehrenbergi</i>      | 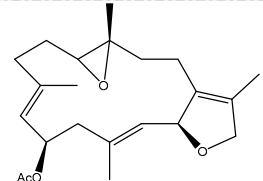   | -6.9 |
| 285 | Sarcophytonoxide D                                                 | <i>S. ehrenbergi</i>      |    | -6.5 |
| 286 | Sarcophytonoxide E                                                 | <i>S. ehrenbergi</i>      |    | -8.0 |
| 287 | Secodihydrosarsolenone                                             | <i>S. trocheliophorum</i> |    | -8.1 |
| 288 | (+)-(1E,3E,11E)-7,8-epoxycembra-1,3,11,15-tetraene                 | <i>S. stellatum</i>       |   | -7.8 |
| 289 | (+)-(7R,8R,14S,1Z,3E,11E)-14-acetoxy-7,8-epoxycembra-1,3,11-Triene | <i>S. stellatum</i>       |  | -7.6 |
| 290 | 3,4,8,16-tetra-epi-lobocrasol                                      | <i>S. glaucum</i>         |  | -7.1 |
| 291 | 1,15β-epoxy-deoxysarcophine                                        | <i>S. glaucum</i>         |  | -7.3 |
| 292 | 3,4-dihydro-4α,7β,8α-trihydroxy-Δ <sup>2</sup> -sarcophine         | <i>S. glaucum</i>         |  | -8.6 |

|     |                                                         |                   |                                                                                      |      |
|-----|---------------------------------------------------------|-------------------|--------------------------------------------------------------------------------------|------|
| 293 | <i>ent</i> -sarcophylide E                              | <i>S. glaucum</i> | 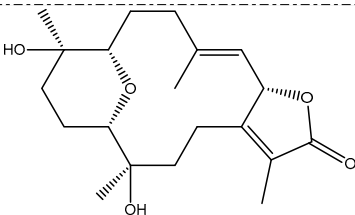   | -7.8 |
| 294 | 3,4-dihydro-4 $\alpha$ -hydroxy- $\Delta^2$ -sarcophine | <i>S. glaucum</i> |    | -7.3 |
| 295 | 3,4-dihydro-4 $\beta$ -hydroxy- $\Delta^2$ -sarcophine  | <i>S. glaucum</i> |    | -7.7 |
| 296 | Klyflaccicembranol F                                    | <i>S. glaucum</i> |   | -7.6 |
| 297 | Sarelengan C                                            | <i>S. elegans</i> |  | -8.2 |
| 298 | Sarelengan D                                            | <i>S. elegans</i> |  | -6.7 |
| 299 | Sarelengan E                                            | <i>S. elegans</i> |  | -8.4 |
| 300 | Sarelengan F                                            | <i>S. elegans</i> |  | -7.8 |

|     |                      |                      |                                                                                      |      |
|-----|----------------------|----------------------|--------------------------------------------------------------------------------------|------|
| 301 | Sarelengan G         | <i>S. elegans</i>    | 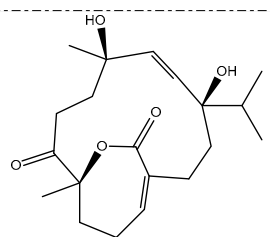   | -7.4 |
| 302 | Sarcoehrenbergilid A | <i>S. ehrenbergi</i> |    | -6.9 |
| 303 | Sarcoehrenbergilid B | <i>S. ehrenbergi</i> |    | -8.8 |
| 304 | Sarcoehrenbergilid C | <i>S. ehrenbergi</i> |    | -8.2 |
| 305 | Sinulolides A        | <i>S. ehrenbergi</i> |   | -7.4 |
| 306 | Sinulolide B         | <i>S. ehrenbergi</i> |  | -7.3 |
| 307 | Sarcoehrenbergilid D | <i>S. ehrenbergi</i> |  | -7.2 |
| 308 | Sarcoehrenbergilid E | <i>S. ehrenbergi</i> |  | -7.0 |
| 309 | Sarcoehrenbergilid F | <i>S. ehrenbergi</i> |  | -7.8 |

|     |                    |                            |                                                                                      |      |
|-----|--------------------|----------------------------|--------------------------------------------------------------------------------------|------|
| 310 | Sarcoehrenolide A  | <i>S. ehrenberg</i>        | 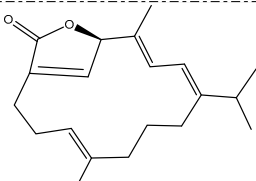   | -7.7 |
| 311 | Sarcoehrenolide B  | <i>S. ehrenbergi</i>       |    | -7.0 |
| 312 | Sarcoehrenolide C  | <i>S. ehrenbergi</i>       |    | -6.8 |
| 313 | Sarcoehrenolide D  | <i>S. ehrenbergi</i>       |    | -7.6 |
| 314 | Sarcoehrenolide E  | <i>S. ehrenbergi</i>       |   | -7.5 |
| 315 | Sarinfacetamide A  | <i>S. infundibuliforme</i> |  | -7.4 |
| 316 | Sarinfacetamides B | <i>S. infundibuliforme</i> |  | -8.4 |

|     |                                                                              |                            |                                                                                      |      |
|-----|------------------------------------------------------------------------------|----------------------------|--------------------------------------------------------------------------------------|------|
| 317 | Nanolobatin B                                                                | <i>S. infundibuliforme</i> | 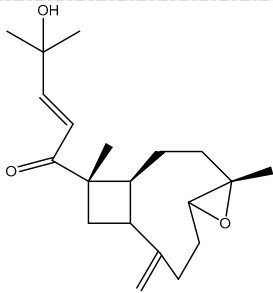   | -8.1 |
| 318 | (1S,2E,4R,6E,8S,11S,12S)-11,12-epoxy-8-hydroperoxy-4-hydroxy-2,6-cembradiene | <i>Sarcophyton sp.</i>     |    | -8.6 |
| 319 | Sarcomililatol A                                                             | <i>S. mililatensis</i>     |    | -7.2 |
| 320 | Sarcomililatol B                                                             | <i>S. mililatensis</i>     |   | -7.8 |
| 321 | Sarcomililate A                                                              | <i>S. mililatensis</i>     |  | -5.9 |
| 322 | Sarcophytol M                                                                | <i>S. mililatensis</i>     |  | -7.7 |
| 323 | 9-hydroxy-7,8dehydro-sarcotrocheliol                                         | <i>S. trocheliophorum</i>  |  | -6.6 |
| 324 | 8,9-expoy-sarcotrocheliol acetate                                            | <i>S. trocheliophorum</i>  |  | -6.9 |

325 Bisglaucumlide A *S. glaucum* -9.6

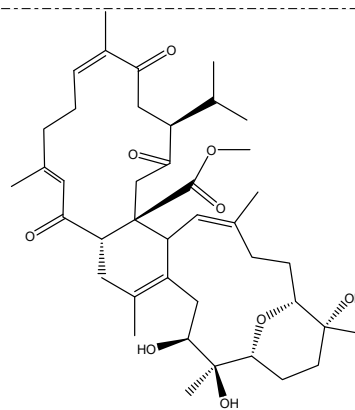

326 Bisglaucumlide B *S. glaucum* -8.1

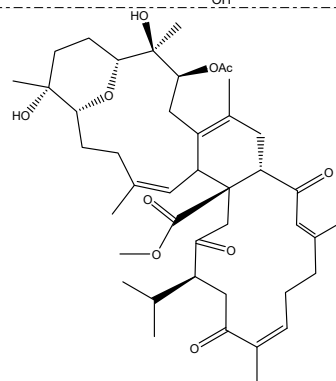

327 Bisglaucumlide C *S. glaucum* -5.1

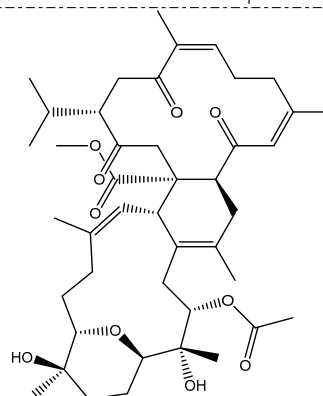

328 Bisglaucumlide D *S. glaucum* -5.7

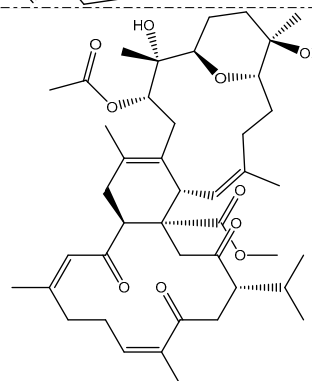

329 Glaucumolide A *S. glaucum* -8.0

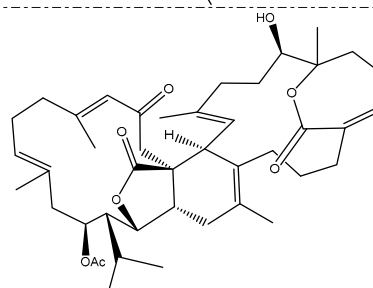

330      Glaucumolide B      *S. glaucum*

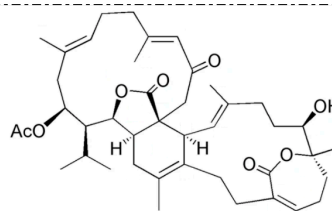

−7.3

331      Ximaolide A      *S. tortuosum*

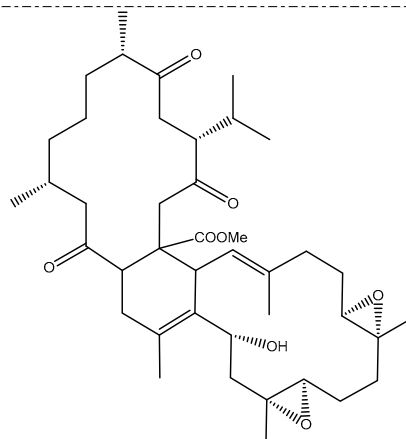

−9.3

332      Ximaolide B      *S. tortuosum*

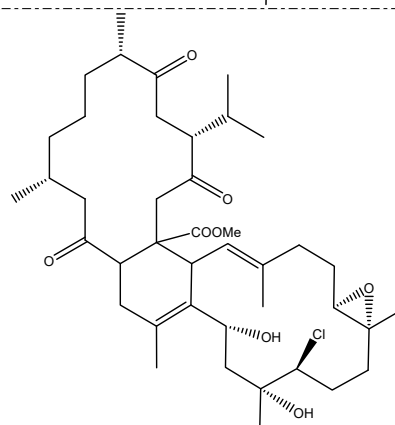

−8.2

333      Ximaolide C      *S. tortuosum*

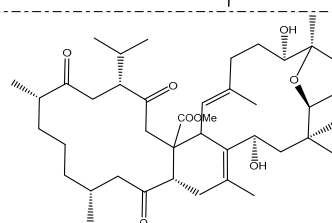

−7.6

334      Ximaolide D      *S. tortuosum*

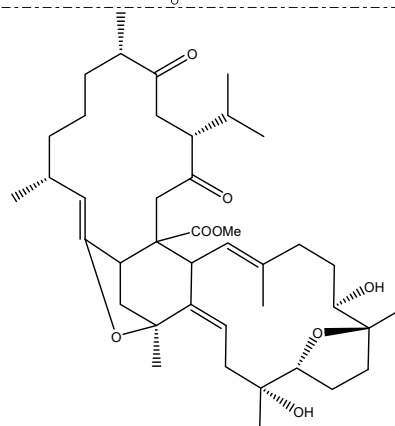

−8.0

335 Ximaolide E *S. tortuosum* -9.0

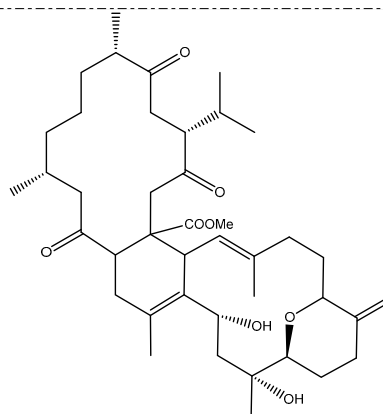

336 Ximaolide F *S. tortuosum* -9.5

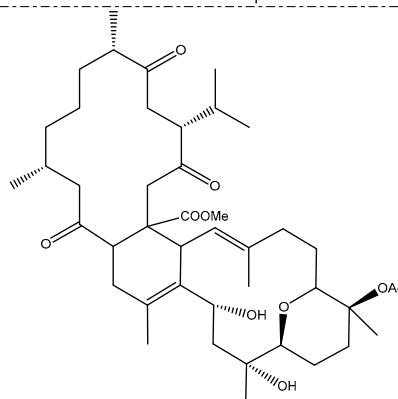

337 Ximaolide G *S. tortuosum* -7.3

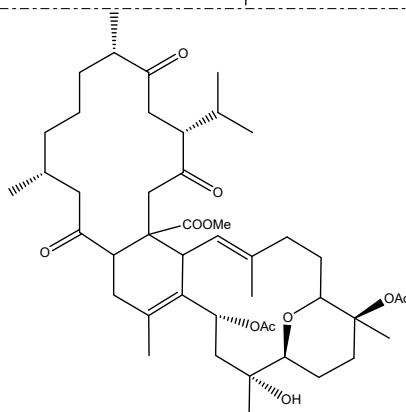

338 Methyl tortuosoate A *S. tortuosum* -8.4

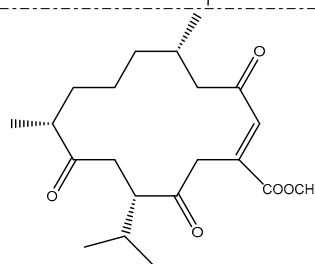

339 Isosarcophytonolide D *S. tortuosum* -7.6

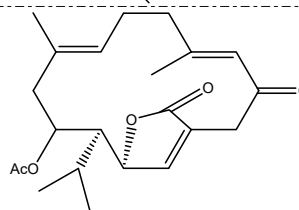

340 Bislatumlide A *S. latum* -9.6

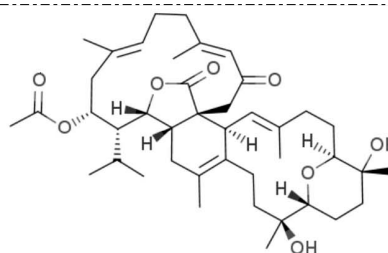

341 Bislatumlide B *S. latum* -8.2

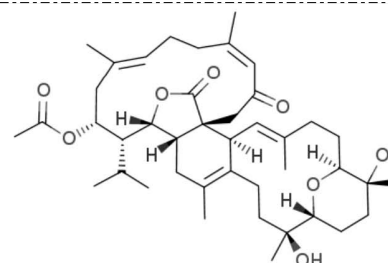

342 Methyl tetrahydrosarcoate *S. elegans* -8.1

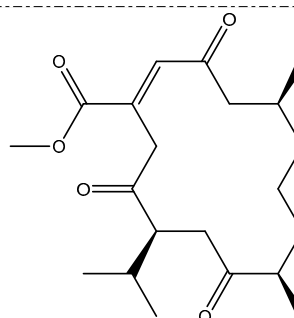

343 Methyl tetrahydroisosarcoate *S. elegans* -7.4

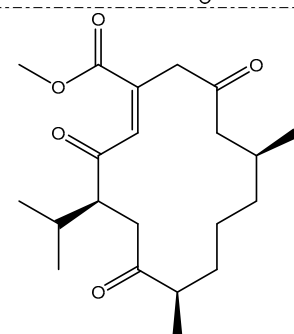

344 Nyalolide *S. elegans* -7.5

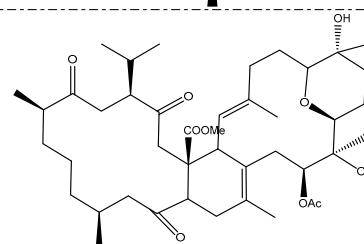

345 Desacetylnyalolide *S. elegans* -8.3

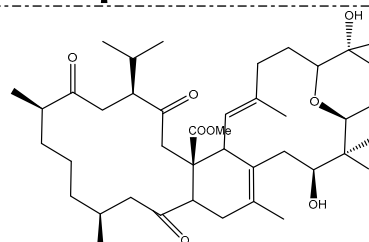

346 Diepoxynyalolide *S. elegans* -7.7

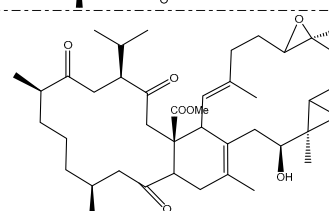

347      Dioxanyalolide      *S. elegans*      -9.5

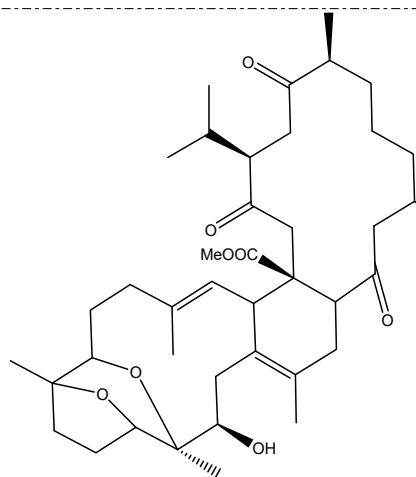

348      Sarcophytolide G      *S. elegans*      -7.4

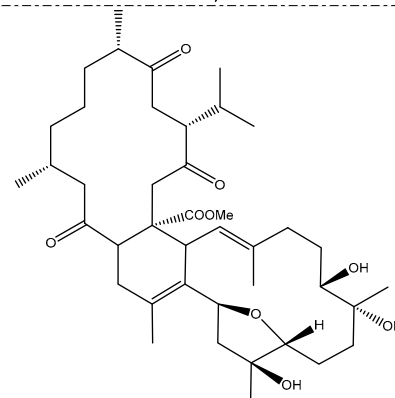

349      Sarcophytolide H      *S. glaucum*      -8.5

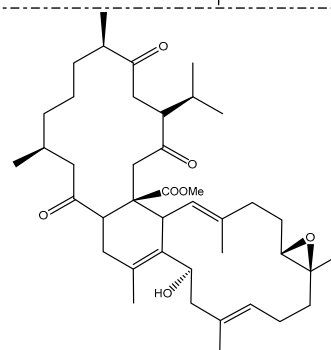

350      Sarcophytolide I      *S. elegans*      -7.5

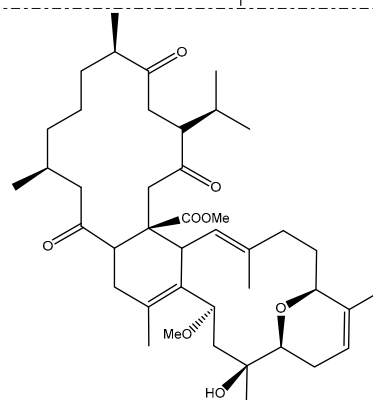

351 Sarcophytolide J *S. elegans* -8.0

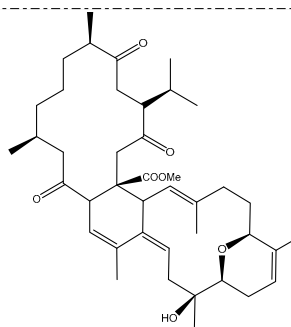

352 Sarcophytolide K *S. elegans* -7.1

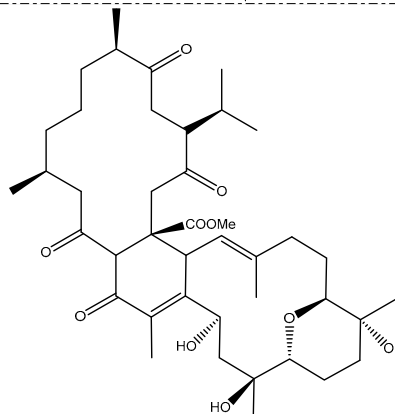

353 Sarcophytolide L *S. elegans* -6.9

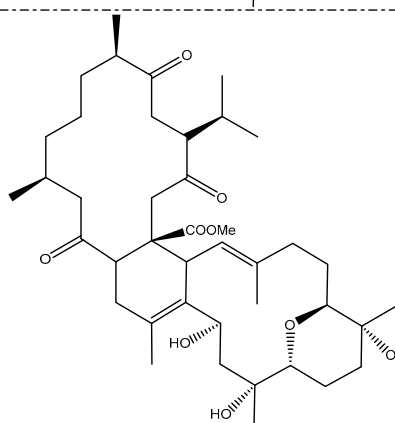

354 Lobophytone H *S. elegans* -8.1

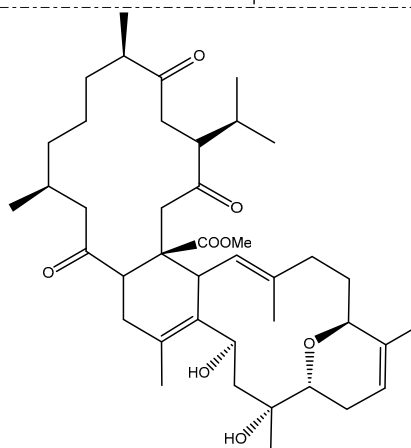

355 Lobophytone I *S. elegans* -8.5

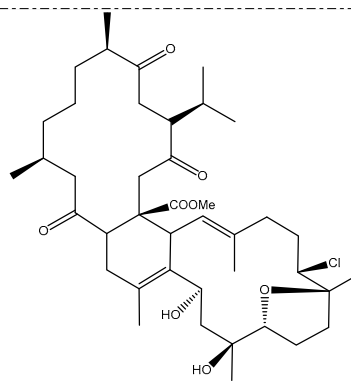

356 Lobophytone K *S. elegans* -8.3

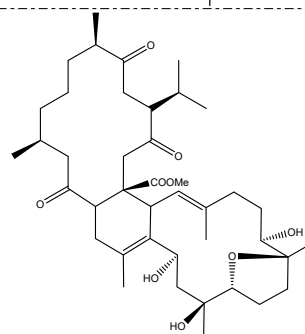

357 Lobophytone W *S. elegans* -8.7

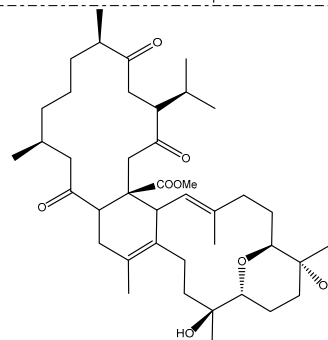

358 Lobophytone U *S. pauciplicatum* -8.6

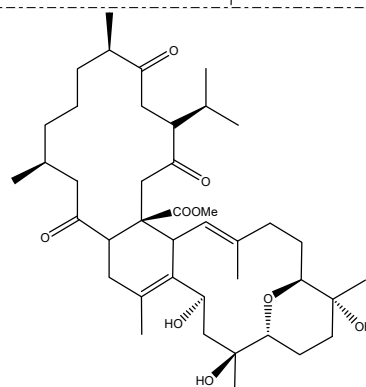

359 Sarcophytolide M *S. pauciplicatum* -7.2

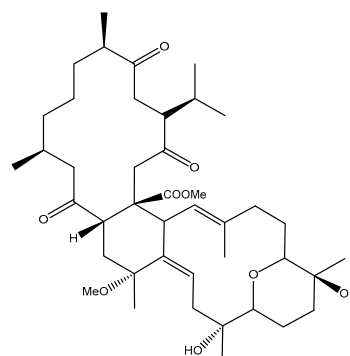

360 Sarcophytolide N *S. pauciplicatum* -7.0

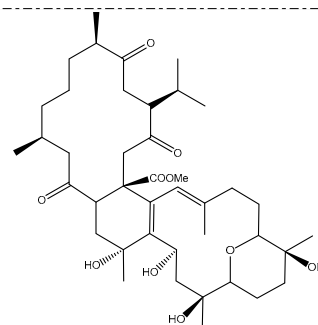

361 Lobophytone O *S. pauciplicatum* -8.6

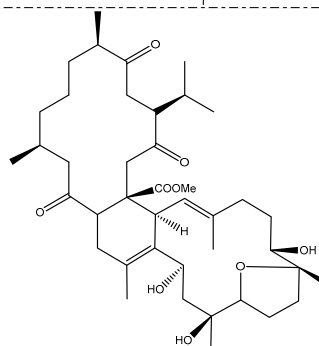

362 Sarelengan A *S. elegans* -8.1

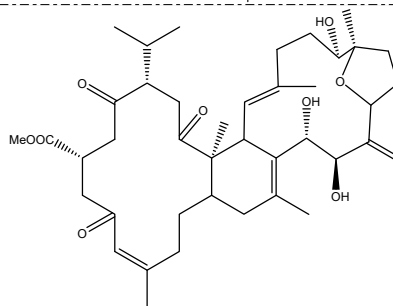

363 Sarelengan B *S. elegans* -9.8

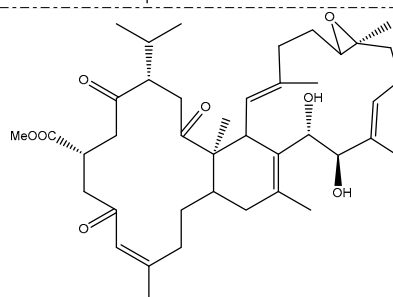

<sup>a</sup>Data sorted according to the order of the compounds in Ref. (Elkhawas et al., 2020).

**Table S2.** Computed Autodock and MM/GBSA binding energies (in kcal/mol) for darunavir and the top 58 potent *Sarcophyton* cembranoid diterpenes metabolites against SARS-CoV-2 main protease (M<sup>pro</sup>) over 250 ps implicit solvent MD simulations<sup>a</sup>.

| Compound Name                                                                           | Docking Score<br>(kcal/mol) | MM/GBSA<br>Binding Energy<br>(kcal/mol) |
|-----------------------------------------------------------------------------------------|-----------------------------|-----------------------------------------|
| Darunavir                                                                               | -8.2                        | -31.1                                   |
| Bislatulide A, B (340)                                                                  | -9.6                        | -45.1                                   |
| Desacetylinalolide (345)                                                                | -8.3                        | -43.3                                   |
| Dioxanyalolide (347)                                                                    | -9.5                        | -40.8                                   |
| Sarelengan B (363)                                                                      | -9.8                        | -40.7                                   |
| Lobophytone W (357)                                                                     | -8.7                        | -39.2                                   |
| Bisglaucumide A (325)                                                                   | -9.6                        | -31.0                                   |
| Sarinacetamides B (316)                                                                 | -8.4                        | -31.0                                   |
| Methyl sarcotroate B (173)                                                              | -8.5                        | -30.9                                   |
| Sarcophytonolide B (39)                                                                 | -8.7                        | -30.8                                   |
| Sarcophytolide H (349)                                                                  | -8.5                        | -30.8                                   |
| Sarcocrassocolide E (141)                                                               | -8.3                        | -30.7                                   |
| Sarcocrassocolide N (151)                                                               | -9.4                        | -30.7                                   |
| Ximaolide A (331)                                                                       | -9.3                        | -30.6                                   |
| 7-Acetyl-8-epi- sinumaximol G (131)                                                     | -8.3                        | -30.6                                   |
| Ximaolide E (335)                                                                       | -9.0                        | -30.5                                   |
| Methyl tetrahydrosarcoate and methyl<br>tetrahydroisosarcoate (342)                     | -8.3                        | -30.5                                   |
| Sarcophinediol (215)                                                                    | -8.6                        | -30.5                                   |
| Lobophytone K (356)                                                                     | -8.3                        | -30.5                                   |
| Sarcocrassocolide H (145)                                                               | -8.3                        | -30.2                                   |
| Sarcocrassocolide J (147)                                                               | -9.1                        | -30.1                                   |
| Sarcocrassocolide I (146)                                                               | -8.3                        | -30.1                                   |
| Lobophytone O (361)                                                                     | -8.6                        | -30.0                                   |
| Sarcofuranocembrenolide A (127)                                                         | -8.5                        | -29.9                                   |
| Ent-sarcophine (122)                                                                    | -8.6                        | -29.8                                   |
| Lobophytone U (358)                                                                     | -8.6                        | -29.6                                   |
| Lobophytone I (355)                                                                     | -8.5                        | -29.4                                   |
| Tortuosene A (201)                                                                      | -8.5                        | -29.4                                   |
| Sarcophytolide A (187)                                                                  | -9.3                        | -29.3                                   |
| (1R,2E,4S,6E,8R,11R,12R)-2,6-cembradiene-<br>4,8,11,12-tetrol (204)                     | -8.3                        | -29.2                                   |
| Sarcophytol G (264)                                                                     | -8.3                        | -29.0                                   |
| (+)-12-methoxycarbonyl-11Z-sarcophine (158)                                             | -8.9                        | -28.8                                   |
| (+)-1,15-epoxy-2-methoxy-12methoxycarbonyl-11E-<br>sarcophytoxide (248)                 | -8.4                        | -28.5                                   |
| Ximaolide F (336)                                                                       | -9.5                        | -28.5                                   |
| Sarcocrassocolide F (143)                                                               | -9.0                        | -28.5                                   |
| Sarcophytonolide M (174)                                                                | -9.0                        | -28.3                                   |
| 3,4-dihydro-4 $\alpha$ ,7 $\beta$ ,8 $\alpha$ -trihydroxy- $\Delta^2$ -sarcophine (292) | -8.6                        | -28.1                                   |
| Glaucomolide A (329)                                                                    | -9.4                        | -27.9                                   |
| Sarelengan E (299)                                                                      | -8.4                        | -27.4                                   |
| Sarcocrassolide A (8)                                                                   | -9.0                        | -27.2                                   |
| Methyl tortuosoate A (338)                                                              | -8.4                        | -27.2                                   |
| (4Z,12Z,14E)-sarcophytolide (31)                                                        | -8.8                        | -26.2                                   |

|                                                                                             |      |       |
|---------------------------------------------------------------------------------------------|------|-------|
| Sarcoehrenbergilid B ( <b>303</b> )                                                         | −8.8 | −26.2 |
| Ehrenbergol B ( <b>180</b> )                                                                | −8.8 | −26.0 |
| Sarcocrassocolide G ( <b>144</b> )                                                          | −8.5 | −25.9 |
| Sarsolenone ( <b>223</b> )                                                                  | −8.9 | −25.4 |
| Crassolide ( <b>7</b> )                                                                     | −8.5 | −25.3 |
| Sarcophytonins F ( <b>129</b> )                                                             | −8.3 | −25.2 |
| Lobophynin C ( <b>162</b> )                                                                 | −8.5 | −25.2 |
| (1S,2E,4R,6E,8S,11S,12S)-11,12-Epoxy-2,6-cembrane-4,8-diol ( <b>17</b> )                    | −8.3 | −24.9 |
| Secosarcophinolide ( <b>121</b> )                                                           | −8.4 | −24.8 |
| Sacostolide D ( <b>105</b> )                                                                | −8.4 | −24.3 |
| Acetyl ehrenberoxide B ( <b>194</b> )                                                       | −8.4 | −24.2 |
| Sarcophytonolide C ( <b>40</b> )                                                            | −8.4 | −23.6 |
| Sarcocrassocolide B ( <b>138</b> )                                                          | −8.6 | −23.6 |
| Denticulatolide ( <b>10</b> )                                                               | −9.9 | −23.3 |
| (1S,2E,4R,6E,8S,11S,12S)-11,12-epoxy-8-hydroperoxy-4-hydroxy-2,6-cembradiene ( <b>318</b> ) | −8.6 | −22.8 |
| 11(S)-hydroperoxylsarcoph-12(20)-ene ( <b>169</b> )                                         | −8.3 | −22.3 |
| Sarcocrassocolide A ( <b>137</b> )                                                          | −8.3 | −21.1 |
| Sarcocrassocolide K ( <b>148</b> )                                                          | −8.3 | −20.0 |

<sup>a</sup>Data sorted according to the calculated MM/GBSA binding energies.

**Table S3.** Network topological analysis for the predicted targets for bislatumlide A (**340**).

| <b>Target</b> | <b>Betweenness Centrality</b> | <b>Closeness Centrality</b> | <b>Degree</b> |
|---------------|-------------------------------|-----------------------------|---------------|
| SRC           | 0.140277931                   | 0.674603175                 | 46            |
| MAPK1         | 0.097973132                   | 0.625000000                 | 37            |
| AR            | 0.076882543                   | 0.586206897                 | 32            |
| MAPK8         | 0.043685125                   | 0.582191781                 | 29            |
| MDM2          | 0.05093431                    | 0.548387097                 | 27            |
| ERBB2         | 0.060499285                   | 0.551948052                 | 26            |
| PTGS2         | 0.062644806                   | 0.562913907                 | 24            |
| IGF1R         | 0.019882126                   | 0.534591195                 | 22            |
| HSP90AB1      | 0.031359945                   | 0.521472393                 | 22            |
| MMP2          | 0.045495406                   | 0.53125000                  | 21            |
| GSK3B         | 0.020712726                   | 0.537974684                 | 21            |
| PRKCA         | 0.031388573                   | 0.527950311                 | 21            |
| PLCG1         | 0.015506616                   | 0.515151515                 | 21            |
| CDKN1B        | 0.014823023                   | 0.518292683                 | 20            |
| LCK           | 0.026151452                   | 0.518292683                 | 19            |
| RPS6KB1       | 0.01034058                    | 0.515151515                 | 19            |
| CASR          | 0.043481068                   | 0.459459459                 | 18            |
| MAPK14        | 0.013888034                   | 0.512048193                 | 18            |
| NR3C1         | 0.034134996                   | 0.534591195                 | 18            |
| CDK4          | 0.015939274                   | 0.505952381                 | 18            |

**Table S4.** Interactors list showing the top 10 genes stimulated by bislatumlide A (**340**), their UniProt Ids and list of genes Ids which Interacts with SARS-CoV-2.

| <b>Input</b> | <b>UniProt Id</b>                                                     | <b>Interacts with</b>                                                                                                                                                                        |
|--------------|-----------------------------------------------------------------------|----------------------------------------------------------------------------------------------------------------------------------------------------------------------------------------------|
| <b>APP</b>   | P05067-4, P05067,<br>P05067-PRO_0000000093,<br>P05067-PRO_0000000092, | P21359, P29353, P02649, P04629,<br>P78352, P00533,<br>P49841, 28815, P08138, Q96FE5,<br>P01100                                                                                               |
| <b>JAK2</b>  | O60674, Q62120                                                        | P46527, O60674, P18031                                                                                                                                                                       |
| <b>AR</b>    | P10275                                                                | P24385, Q92793, Q92993, O14686,<br>P35222, O75593, P55317, Q15596,<br>Q02790, Q9NSA3, Q9UBL3                                                                                                 |
| <b>JUN</b>   | P05412                                                                | P05412, O95644, P07900, Q9UPN9,<br>P15336, P18846, Q00987, P16220,<br>P17275, P52292, P45983, Q15796,<br>Q99966, P01100                                                                      |
| <b>LYN</b>   | P07948-1, P07948                                                      | P46527, Q07666, Q9NWQ8,<br>P12931, P00533, Q05397                                                                                                                                            |
| <b>MAPK1</b> | P28482                                                                | P35813, P10415, Q9BUB5, P28482,<br>P27361, Q15121, P35236, P32121,<br>P46531, Q02750, Q12913, P29353-2                                                                                       |
| <b>MAPK3</b> | P27361                                                                | Q14160, P19419, P28482, P27361,<br>Q15121, Q02750, Q12913                                                                                                                                    |
| <b>MAPK3</b> | P27361                                                                | Q14160, P19419, P28482, P27361,<br>Q15121, Q02750, Q12913                                                                                                                                    |
| <b>MAPK8</b> | P45983                                                                | P05412, Q07817, P00533, P27986,<br>P46108, P60953                                                                                                                                            |
| <b>MDM2</b>  | Q00987, EBI-2694074                                                   | P05412, P49674, Q13547, Q15648,<br>P31749, P32121, P29590, P48729,<br>Q00987, P04271, P08047, Q9Y297,<br>P78352, Q93009, P49757                                                              |
| <b>SRC</b>   | P05480, P00523,<br>P12931, Q9WUD9                                     | P35968, P07900, Q68CZ2, P22681,<br>P18031, Q07666, P32121, P35222,<br>P56945, Q05397, P00519, P08581,<br>Q9Y4D1, P41240, P06241, P07550,<br>P00533, 15532, P27986, Q14289,<br>Q13177, P40763 |
